# Supplementary material for: Heterobimetallic complexes of IrM (M = FeII, CoII, and NiII) core and bridging 2-(diphenylphosphino)pyridine: electronic structure and electrochemical behavior
Source: Royal Society of Chemistry journal article supplement (doi:10.1039/d0dt01801e), 2020-01-01
Supplement: d0dt01801e1.pdf [file d0dt01801e1.pdf]

## Supporting Information

### **Heterobimetallic Complexes of IrM (M = Fe<sup>II</sup>, Co<sup>II</sup>, and Ni<sup>II</sup>) Core and Bridging 2-(Diphenylphosphino)pyridine: Electronic Structure and Electrochemical Behavior**

Valeriy Cherepakhin, Ashley Hellman, Zhenzhuo Lan, Shaama Mallikarjun Sharada, and Travis J. Williams\*

Department of Chemistry, University of Southern California, Los Angeles, California 90089, United States.

\*travisw@usc.edu

### Contents

|                                    |     |
|------------------------------------|-----|
| NMR Spectra of <b>1</b> – <b>4</b> | S2  |
| Computational Studies              | S7  |
| Electrochemical Studies            | S13 |
| Crystal Structure of <b>2</b>      | S18 |
| Crystal Structure of <b>3</b>      | S29 |
| Crystal Structure of <b>4</b>      | S40 |

# NMR Spectra of 1 – 4

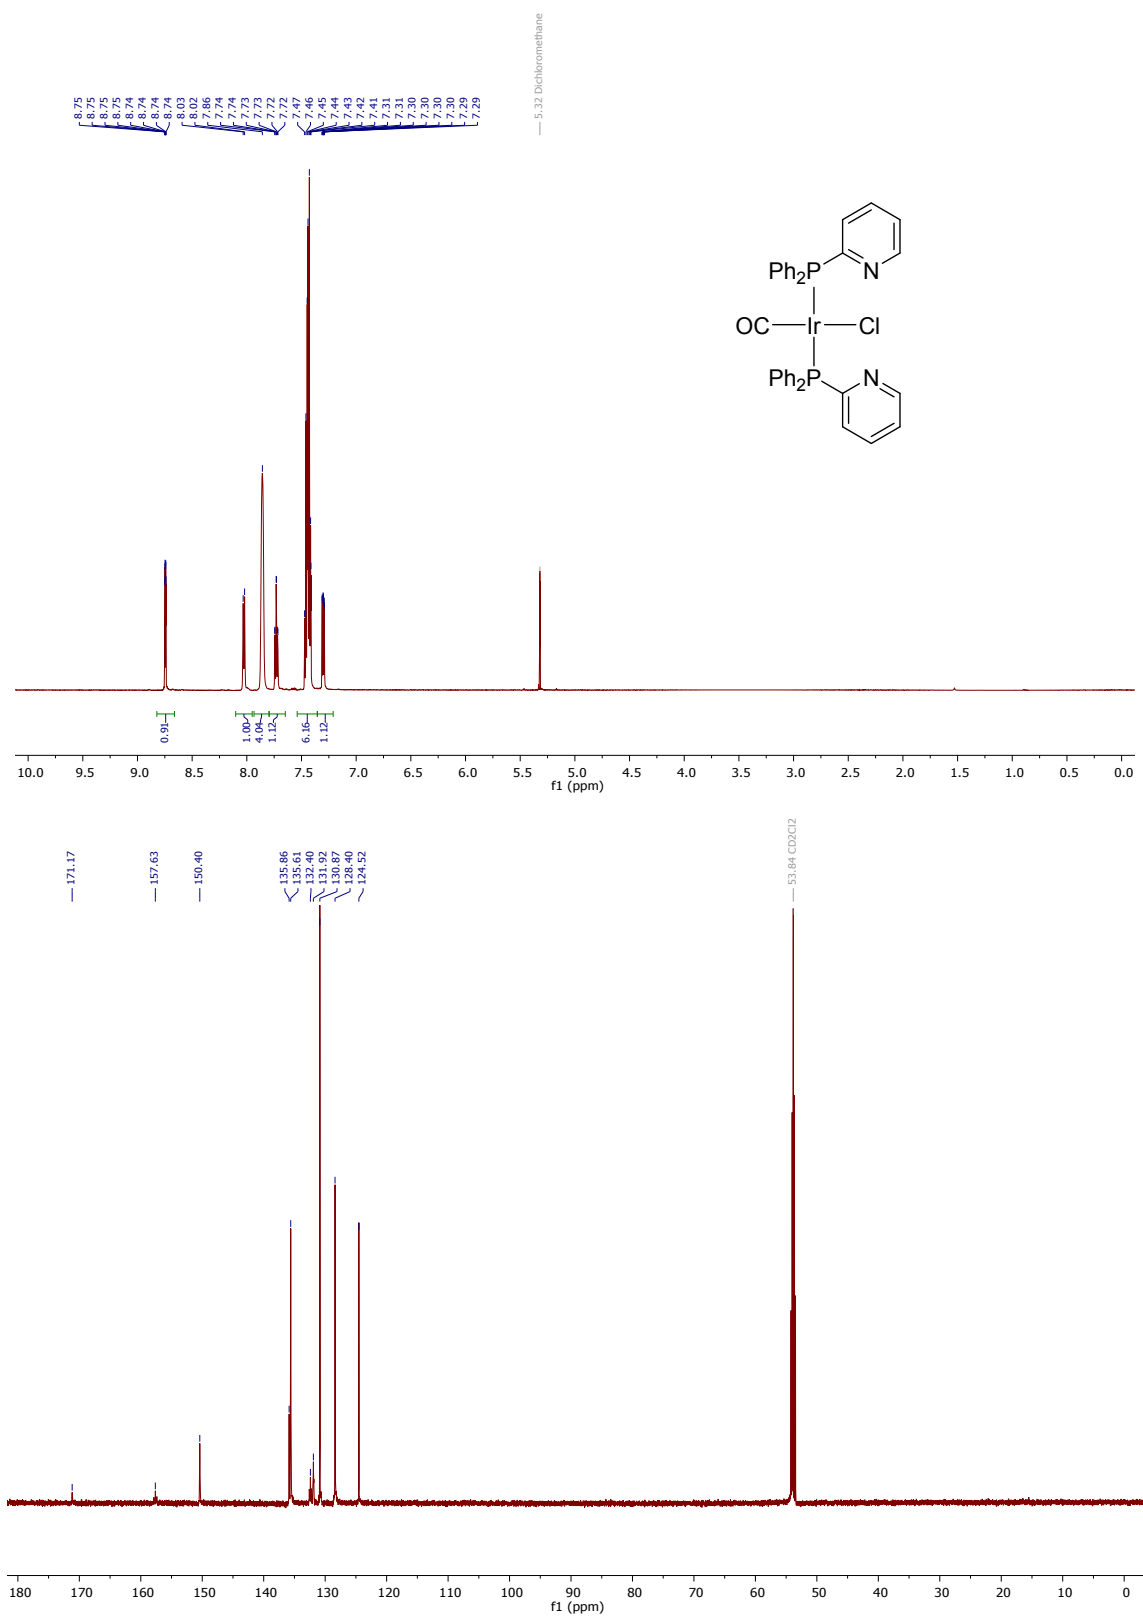

Figure S1. <sup>1</sup>H and <sup>13</sup>C{<sup>1</sup>H} NMR spectra of 1 in CD<sub>2</sub>Cl<sub>2</sub>.

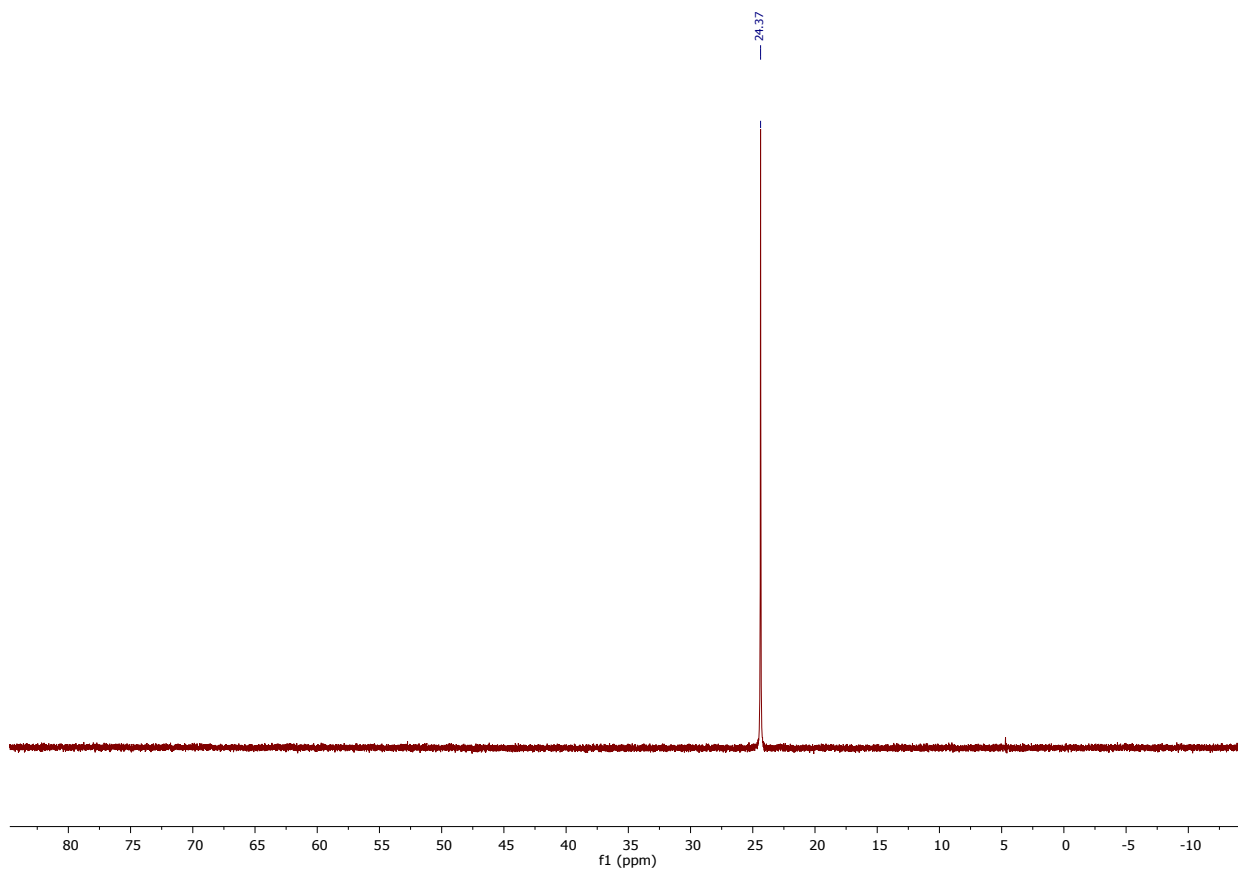

**Figure S2.**  $^{31}\text{P}\{^1\text{H}\}$  NMR spectrum of **1** in  $\text{CD}_2\text{Cl}_2$ .

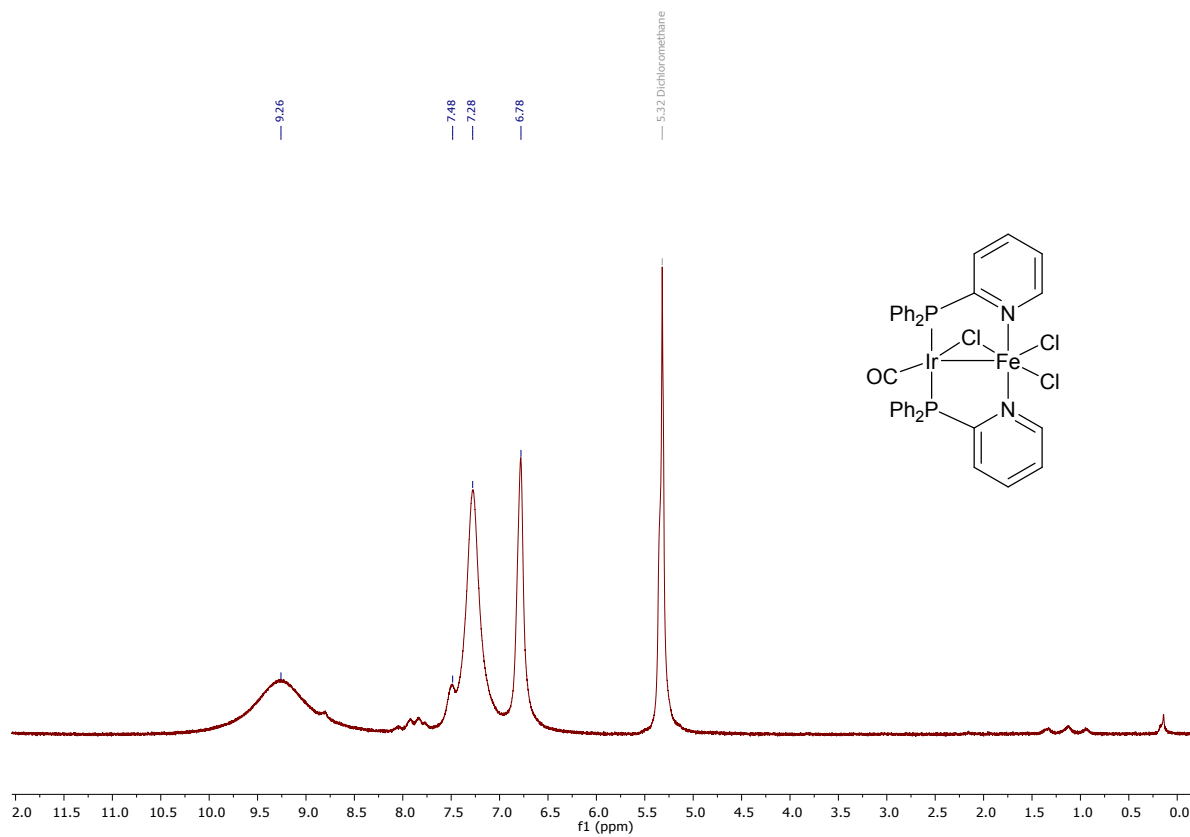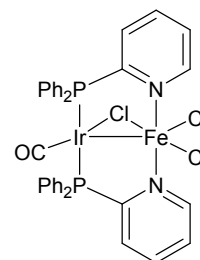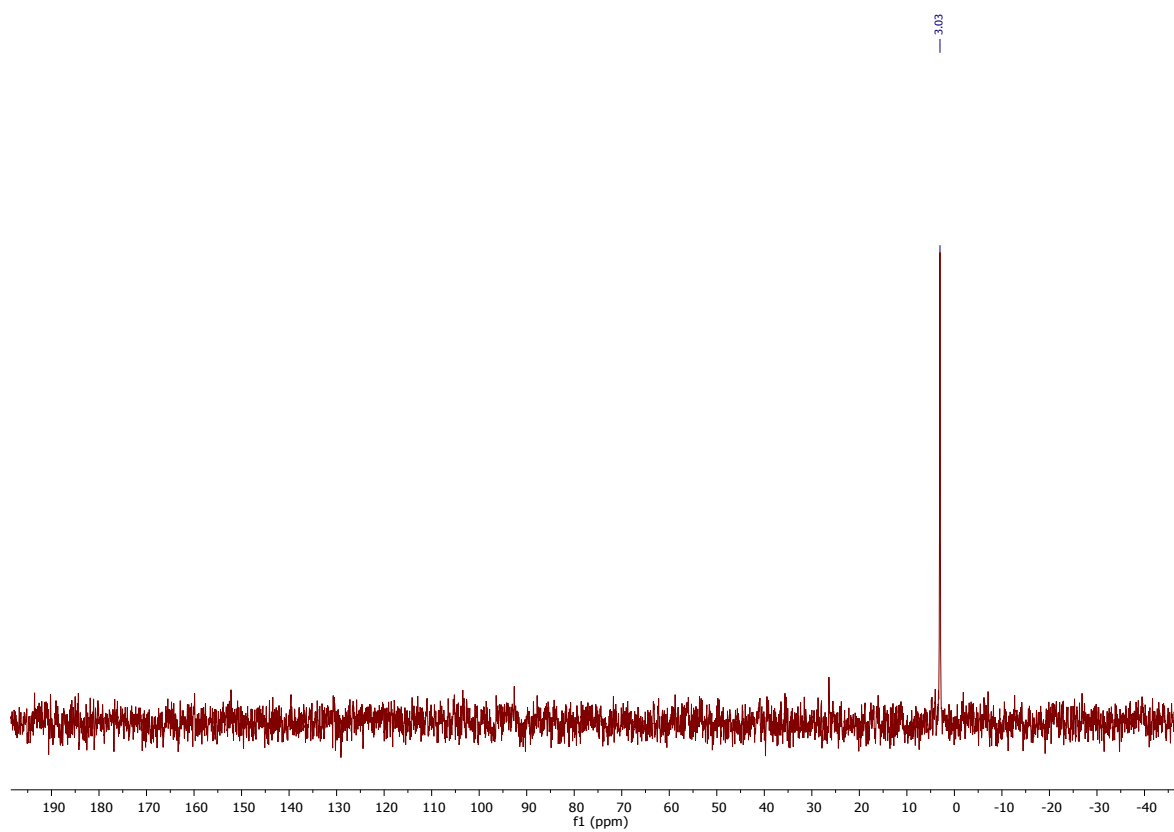

**Figure S3.**  $^1\text{H}$  and  $^{31}\text{P}\{^1\text{H}\}$  NMR spectra of **2** in  $\text{CD}_2\text{Cl}_2$ .

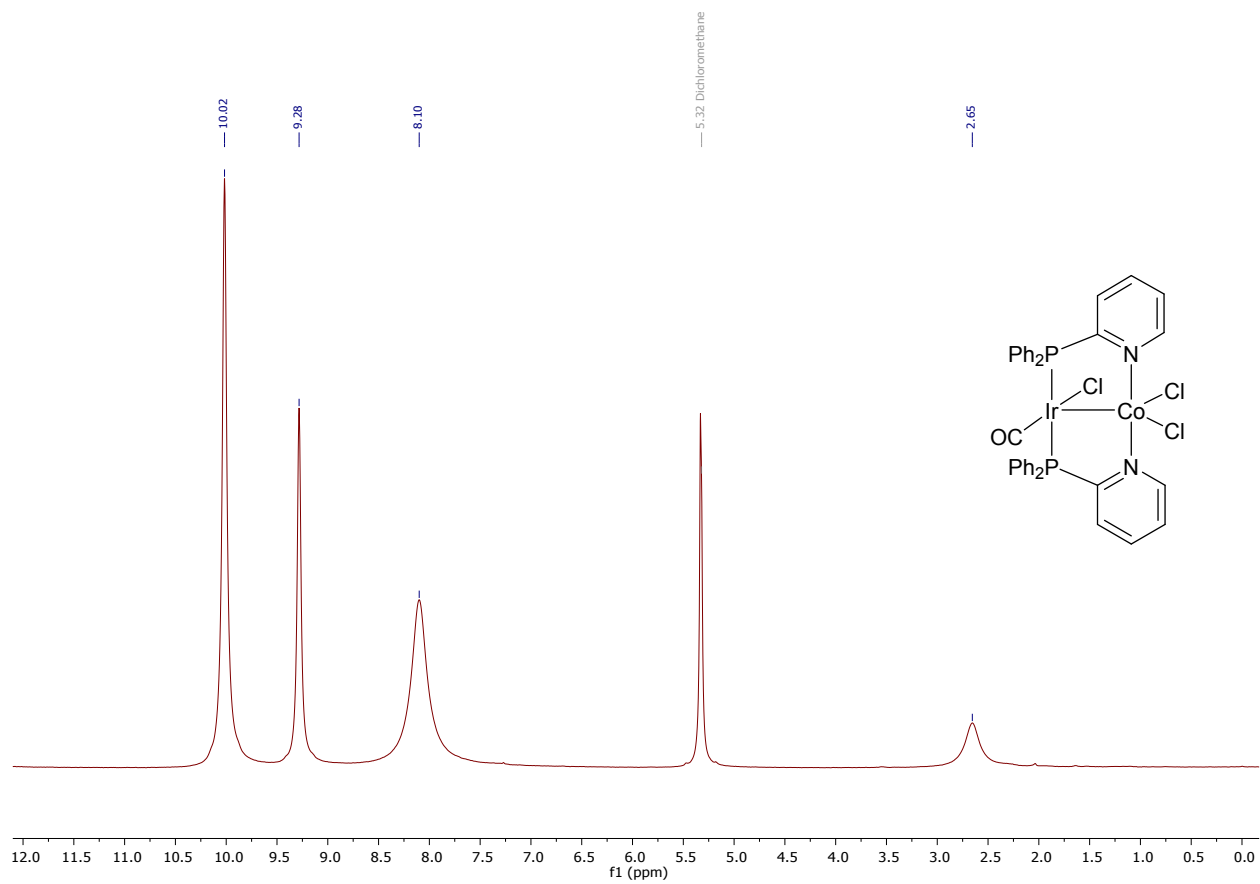

**Figure S4.**  $^1\text{H}$  NMR spectrum of **3** in  $\text{CD}_2\text{Cl}_2$ .

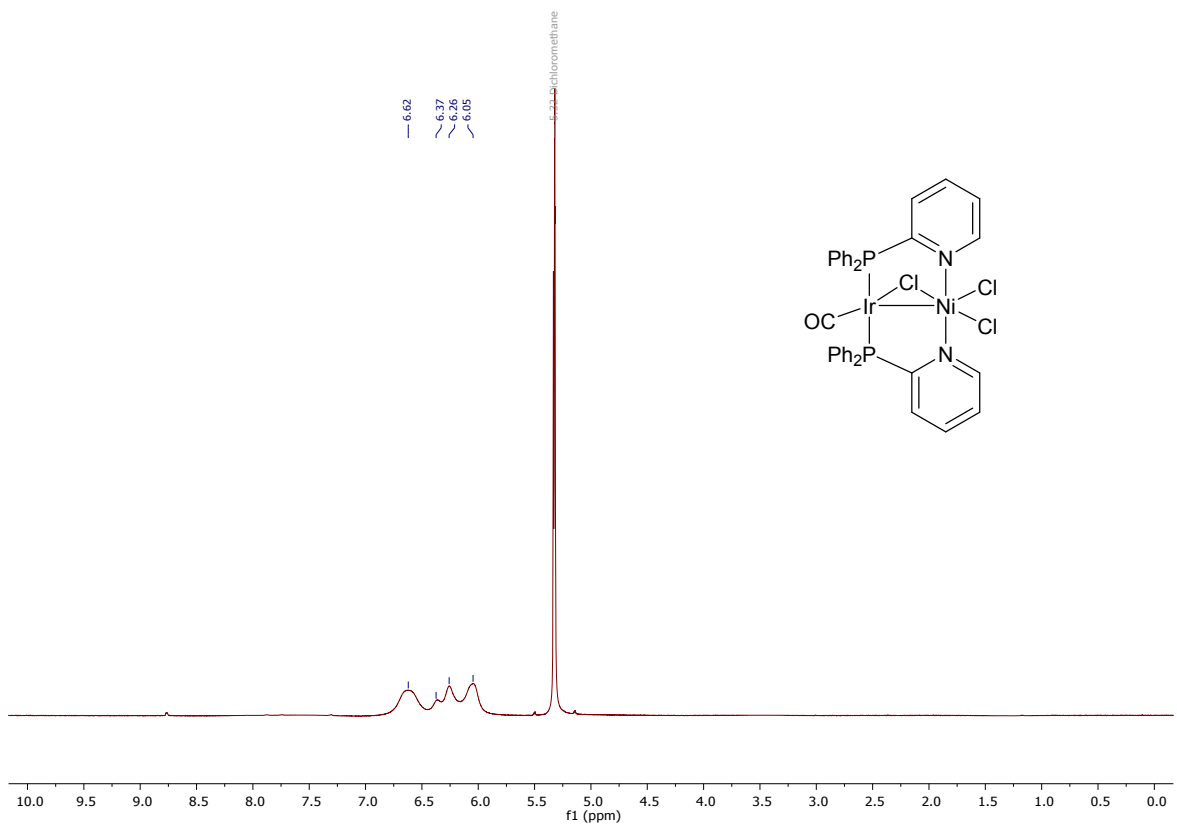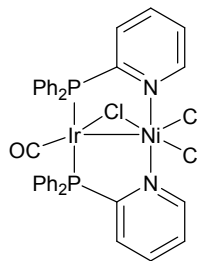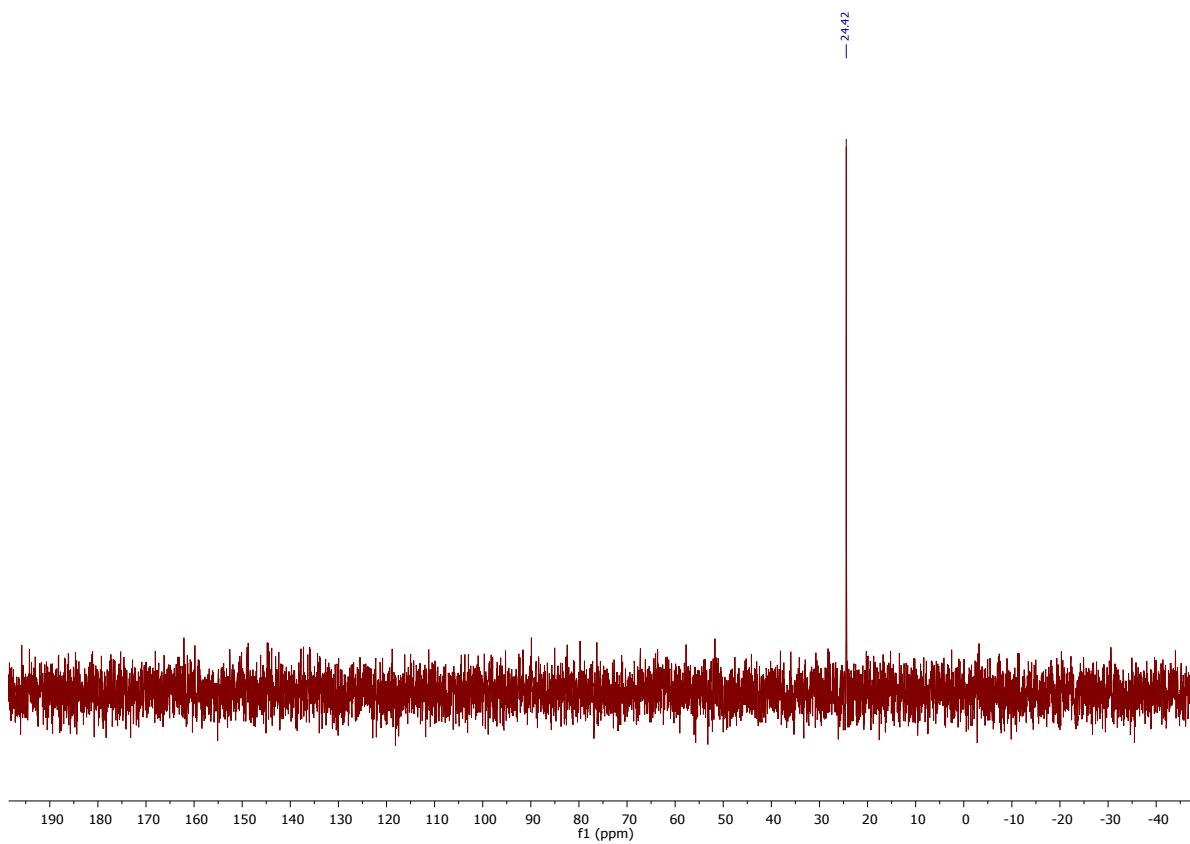

**Figure S5.** <sup>1</sup>H and <sup>31</sup>P{<sup>1</sup>H} NMR spectra of **4** in CD<sub>2</sub>Cl<sub>2</sub>.

## Computational Studies

(TDDFT-based UV-vis spectra, corresponding excitation energies, and oscillator strengths for **1 – 4**)

### Complex 1

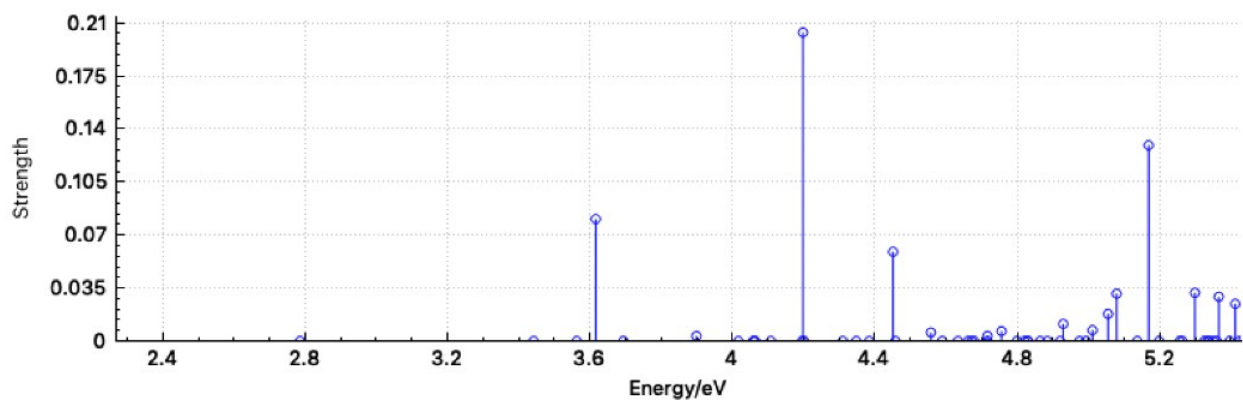

| State     | Excitation energy (eV) | $\langle S^2 \rangle$ | Strength    |
|-----------|------------------------|-----------------------|-------------|
| 1         | 2.79                   | 2                     | 0           |
| 2         | 3.44                   | 2                     | 0           |
| 3         | 3.56                   | 2                     | 0           |
| <b>4</b>  | <b>3.62</b>            | <b>0</b>              | <b>0.08</b> |
| 5         | 3.69                   | 2                     | 0           |
| 6         | 3.90                   | 0                     | 0           |
| 7         | 4.02                   | 2                     | 0           |
| 8         | 4.06                   | 2                     | 0           |
| 9         | 4.06                   | 2                     | 0           |
| 10        | 4.06                   | 2                     | 0           |
| 11        | 4.11                   | 2                     | 0           |
| 12        | 4.20                   | 2                     | 0           |
| <b>13</b> | <b>4.20</b>            | <b>0</b>              | <b>0.20</b> |
| 14        | 4.20                   | 2                     | 0           |
| 15        | 4.31                   | 2                     | 0           |
| 16        | 4.35                   | 2                     | 0           |
| 17        | 4.38                   | 2                     | 0           |
| 18        | 4.45                   | 0                     | 0.06        |
| 19        | 4.46                   | 2                     | 0           |
| 20        | 4.56                   | 0                     | 0.01        |

### Complex 2

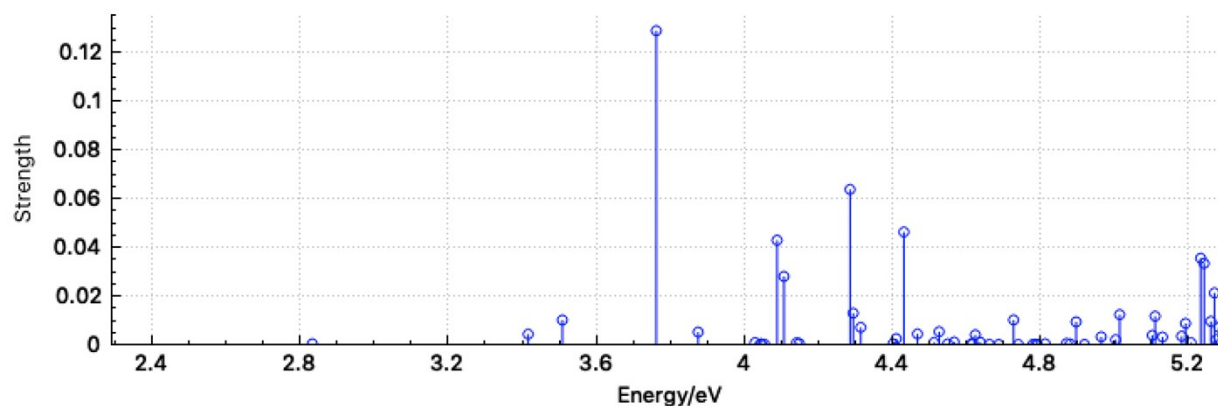

| State    | Excitation energy (eV) | $\langle S^{*2} \rangle$ | Strength    |
|----------|------------------------|--------------------------|-------------|
| 1        | 0.40                   | 6.02                     | 0           |
| 2        | 0.52                   | 6.02                     | 0           |
| 3        | 0.71                   | 6.02                     | 0           |
| 4        | 1.50                   | 6.02                     | 0           |
| 5        | 2.83                   | 7.62                     | 0           |
| 6        | 3.42                   | 7.64                     | 0           |
| 7        | 3.51                   | 7.52                     | 0.01        |
| <b>8</b> | <b>3.76</b>            | <b>6.18</b>              | <b>0.13</b> |
| 9        | 3.88                   | 7.57                     | 0.01        |
| 10       | 4.03                   | 7.99                     | 0           |
| 11       | 4.05                   | 7.95                     | 0           |
| 12       | 4.05                   | 8.01                     | 0           |
| 13       | 4.06                   | 8.00                     | 0           |
| 14       | 4.09                   | 6.84                     | 0.04        |
| 15       | 4.11                   | 7.03                     | 0.03        |
| 16       | 4.14                   | 7.97                     | 0           |
| 17       | 4.15                   | 7.98                     | 0           |
| 18       | 4.29                   | 6.20                     | 0.06        |
| 19       | 4.29                   | 7.45                     | 0.01        |
| 20       | 4.31                   | 6.48                     | 0.01        |



### Complex 3

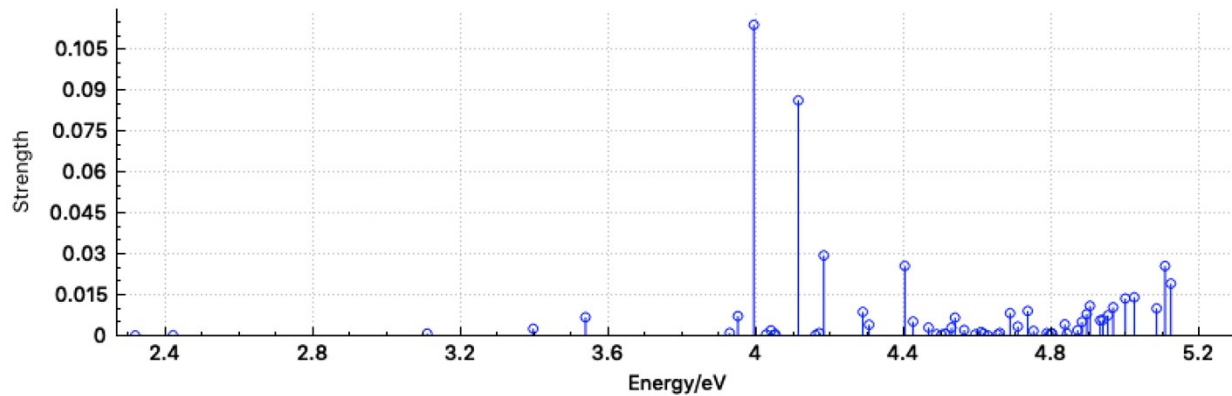

| State     | Excitation energy (eV) | $\langle S^{*2} \rangle$ | Strength    |
|-----------|------------------------|--------------------------|-------------|
| 1         | 0.15                   | 3.77                     | 0           |
| 2         | 0.15                   | 3.77                     | 0           |
| 3         | 0.83                   | 3.77                     | 0           |
| 4         | 0.90                   | 3.77                     | 0           |
| 5         | 2.32                   | 3.77                     | 0           |
| 6         | 2.42                   | 3.77                     | 0           |
| 7         | 3.11                   | 5.10                     | 0           |
| 8         | 3.40                   | 5.38                     | 0           |
| 9         | 3.54                   | 5.24                     | 0.01        |
| 10        | 3.93                   | 3.90                     | 0           |
| 11        | 3.95                   | 4.90                     | 0.01        |
| <b>12</b> | <b>3.99</b>            | <b>3.91</b>              | <b>0.11</b> |
| 13        | 4.03                   | 5.75                     | 0           |
| 14        | 4.04                   | 5.71                     | 0           |
| 15        | 4.05                   | 5.75                     | 0           |
| 16        | 4.05                   | 5.75                     | 0           |
| 17        | 4.11                   | 4.20                     | 0.09        |
| 18        | 4.16                   | 5.75                     | 0           |
| 19        | 4.17                   | 5.71                     | 0           |
| 20        | 4.18                   | 3.98                     | 0.03        |

### Complex 4

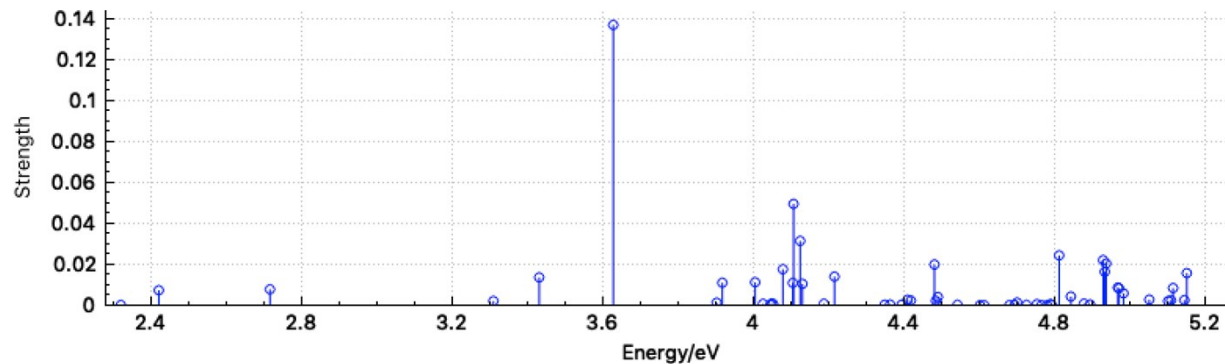

| State     | Excitation energy (eV) | $\langle S^{*2} \rangle$ | Strength    |
|-----------|------------------------|--------------------------|-------------|
| 1         | 1.02                   | 2.02                     | 0           |
| 2         | 1.46                   | 2.01                     | 0           |
| 3         | 1.51                   | 2.01                     | 0           |
| 4         | 2.21                   | 2.01                     | 0           |
| 5         | 2.32                   | 2.01                     | 0           |
| 6         | 2.42                   | 2.06                     | 0.01        |
| 7         | 2.72                   | 3.33                     | 0.01        |
| 8         | 3.31                   | 3.34                     | 0           |
| 9         | 3.43                   | 3.24                     | 0.01        |
| <b>10</b> | <b>3.63</b>            | <b>2.31</b>              | <b>0.14</b> |
| 11        | 3.90                   | 2.70                     | 0           |
| 12        | 3.92                   | 3.57                     | 0.01        |
| 13        | 4.01                   | 2.49                     | 0.01        |
| 14        | 4.03                   | 3.99                     | 0           |
| 15        | 4.05                   | 3.99                     | 0           |
| 16        | 4.05                   | 3.97                     | 0           |
| 17        | 4.05                   | 3.95                     | 0           |
| 18        | 4.08                   | 2.26                     | 0.02        |
| 19        | 4.11                   | 3.57                     | 0.01        |
| 20        | 4.11                   | 2.86                     | 0.05        |

**Table S1.** The dominant natural transition orbital pairs for **1** – **4**.

| Compound | Hole → Particle(1)                                                                                                                 | Hole → Particle(2)                                                                                                                  |
|----------|------------------------------------------------------------------------------------------------------------------------------------|-------------------------------------------------------------------------------------------------------------------------------------|
| <b>1</b> | 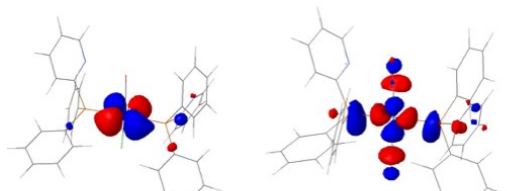 <p>State 13: Excitation energy = 4.20 eV</p>     |                                                                                                                                     |
|          |  <p>State 4: Excitation energy = 3.62 eV</p>      |                                                                                                                                     |
|          |  <p>State 1: Excitation energy = 2.79 eV</p>      |                                                                                                                                     |
| <b>2</b> |  <p>State 8-β: Excitation energy = 3.76 eV</p>  |  <p>State 8-α: Excitation energy = 3.76 eV</p>  |
|          |  <p>State 5-β: Excitation energy = 2.83 eV</p>  |  <p>State 5-α: Excitation energy = 2.83 eV</p>  |
| <b>3</b> |  <p>State 12-β: Excitation energy = 3.99 eV</p> |  <p>State 12-α: Excitation energy = 3.99 eV</p> |

|   |                                                                                                                                                    |                                                                                                                                                     |
|---|----------------------------------------------------------------------------------------------------------------------------------------------------|-----------------------------------------------------------------------------------------------------------------------------------------------------|
|   | 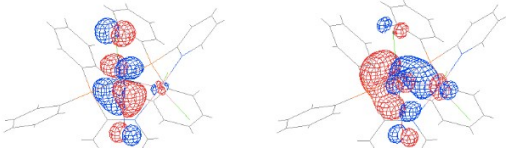 <p>State 8-<math>\beta</math>: Excitation energy = 3.40 eV</p>   |  <p>State 8-<math>\alpha</math>: Excitation energy = 3.40 eV</p>  |
|   |  <p>State 7-<math>\beta</math>: Excitation energy = 3.11 eV</p>   |  <p>State 7-<math>\alpha</math>: Excitation energy = 3.11 eV</p>  |
| 4 | <p>State 10-<math>\beta</math>: Excitation energy = 3.63 eV</p>                                                                                    | <p>State 10-<math>\alpha</math>: Excitation energy = 3.63 eV</p>                                                                                    |
|   |  <p>State 8-<math>\beta</math>: Excitation energy = 3.31 eV</p>   |  <p>State 8-<math>\alpha</math>: Excitation energy = 3.31 eV</p>  |
|   |  <p>State 6-<math>\beta</math>: Excitation energy = 2.42 eV</p> |  <p>State 6-<math>\beta</math>: Excitation energy = 2.42 eV</p> |

### Electrochemical Studies

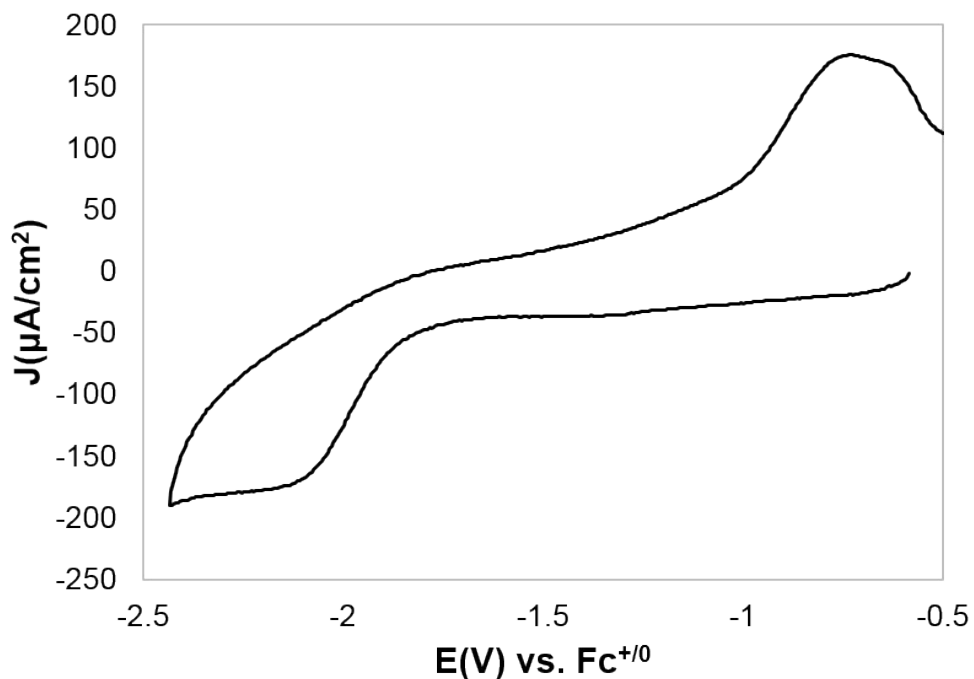

**Figure S6.** Cyclic voltammogram of **2** under N<sub>2</sub> in THF with 0.1 M [nBu<sub>4</sub>N][PF<sub>6</sub>] as the supporting electrolyte (scan rate: 100mV s<sup>-1</sup>). One electrochemically irreversible cathodic couple is observed; however, the electrode is passivated with subsequent scans, and the feature disappears.

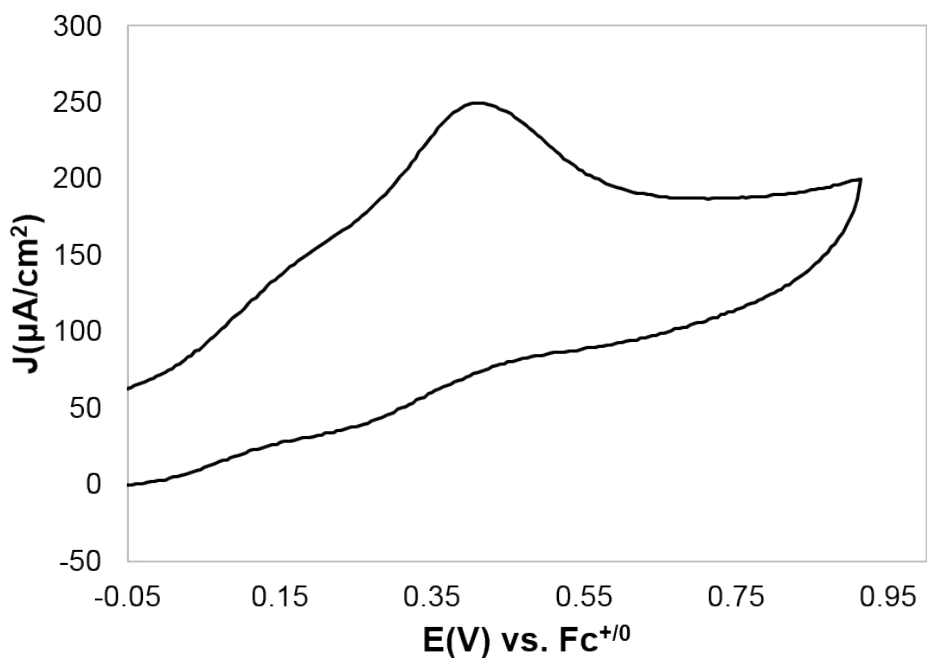

**Figure S7.** Cyclic voltammogram of **2** under N<sub>2</sub> in THF with 0.1 M [nBu<sub>4</sub>N][PF<sub>6</sub>] as the supporting electrolyte (scan rate: 100mV s<sup>-1</sup>). One irreversible oxidative feature is observed, but the electrode becomes passivated with subsequent scans.

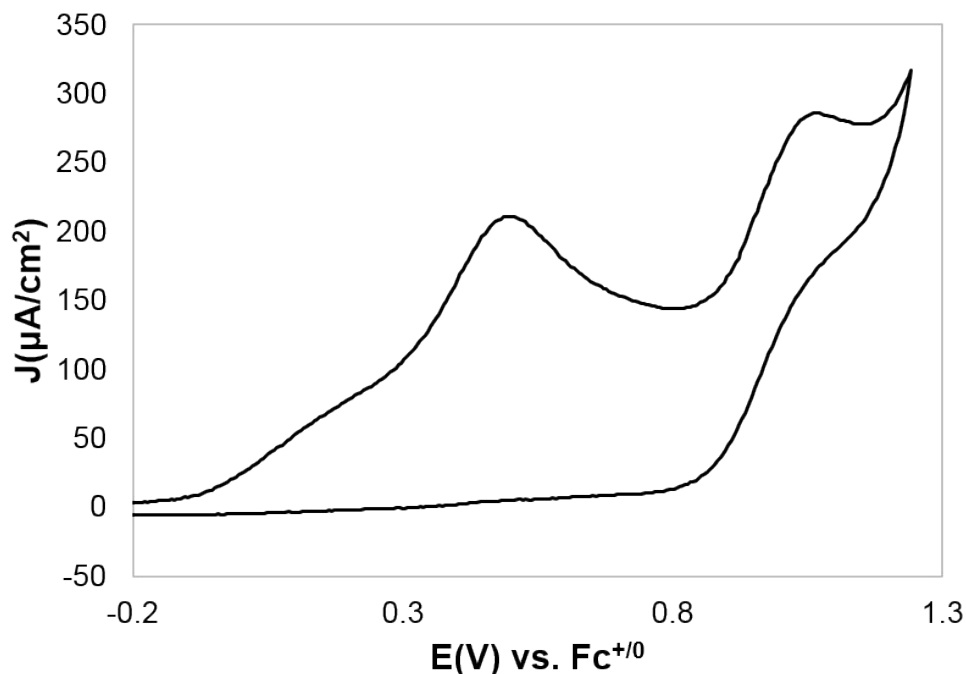

**Figure S8.** Cyclic voltammogram of **3** under N<sub>2</sub> in THF with 0.1 M [nBu<sub>4</sub>N][PF<sub>6</sub>] as the supporting electrolyte (scan rate: 100mV s<sup>-1</sup>). Two irreversible oxidative features are observed.

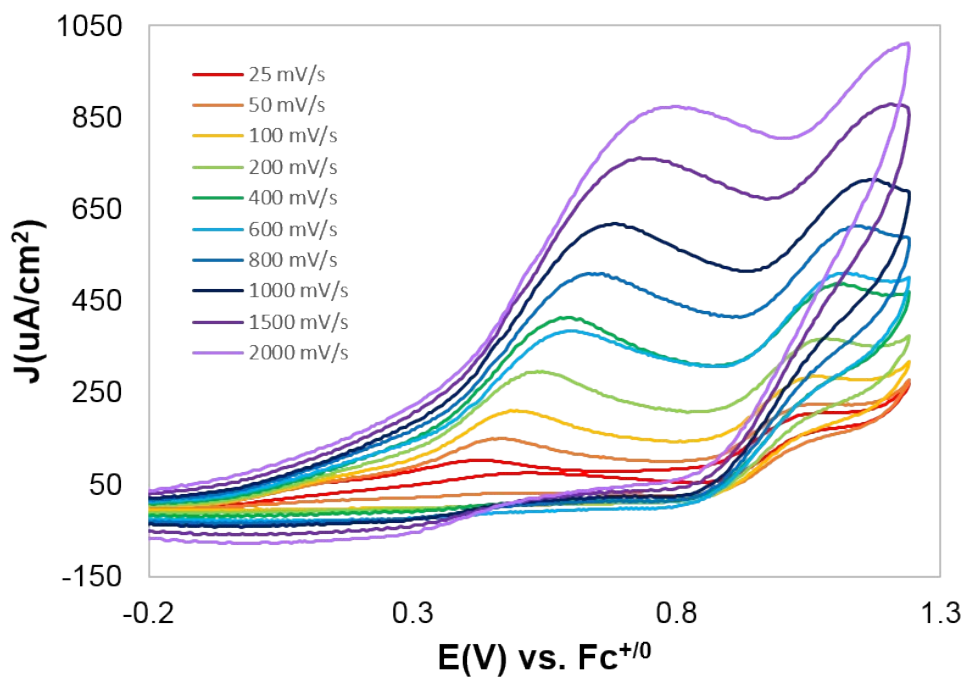

**Figure S9.** Cyclic voltammogram scan rate dependence of **3** in a THF solution containing 0.1 M [nBu<sub>4</sub>N][PF<sub>6</sub>] under an atmosphere of N<sub>2</sub> displaying the observed irreversible features. Scan rates vary from 25 to 2000 mV/s.

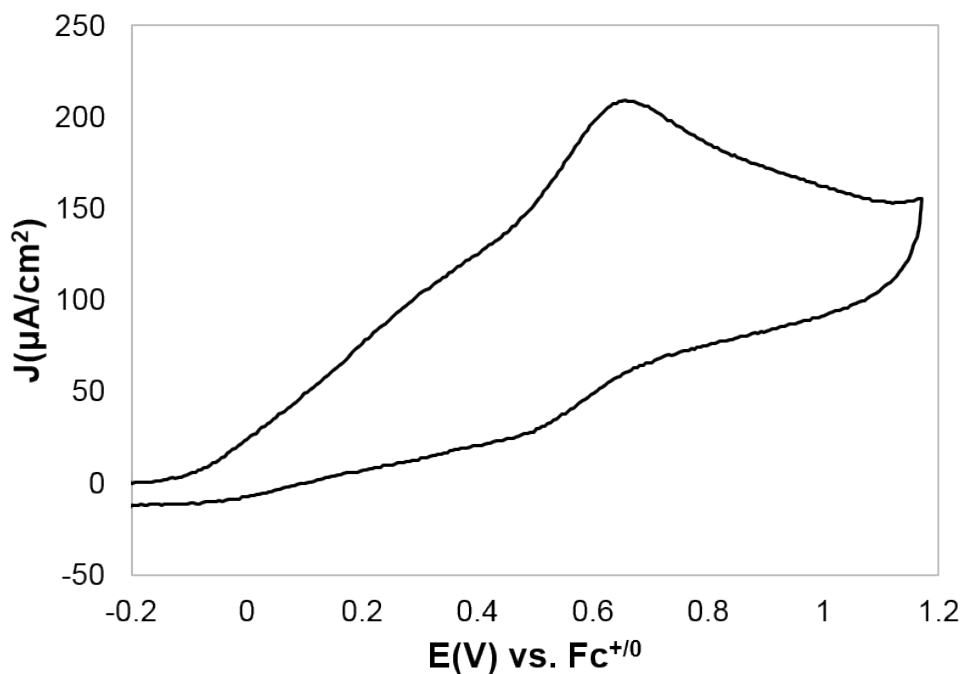

**Figure S10.** Cyclic voltammogram of **4** under  $N_2$  in THF with 0.1 M  $[nBu_4N][PF_6]$  as the supporting electrolyte (scan rate:  $100\text{mV s}^{-1}$ ). One irreversible oxidative feature is observed, but the electrode is passivated with subsequent scans.

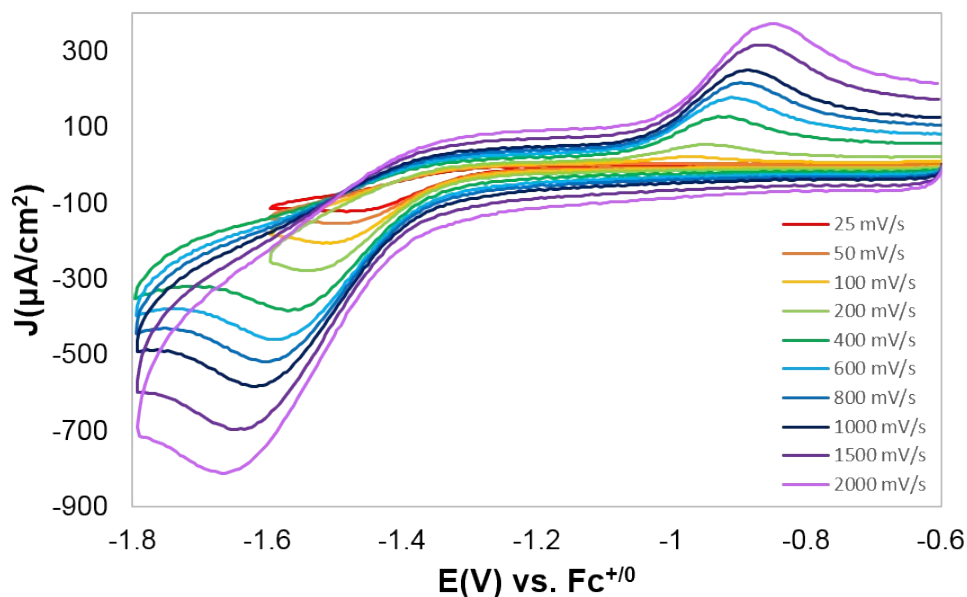

**Figure S11.** Cyclic voltammogram scan rate dependence of **4** in a DCM solution containing 0.1 M  $[nBu_4N][PF_6]$  under an atmosphere of  $N_2$  displaying the observed redox couple. Scan rates vary from 25 to 2000 mV/s.

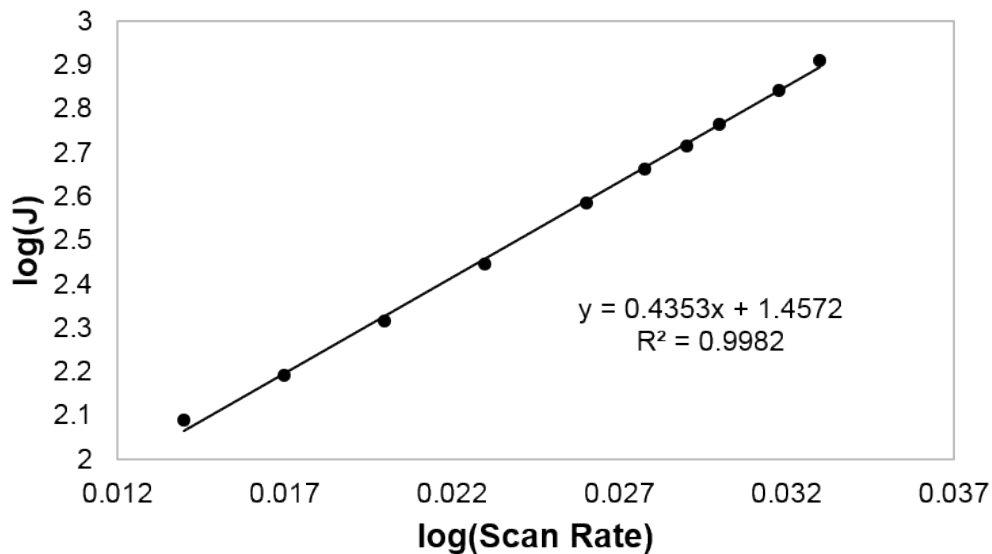

**Figure S12.** Plot of log(current density) versus log(scan rate). The linear relationship with a slope of approximately 0.5 indicates a diffusing molecular species rather than a species adsorbed on the electrode surface.

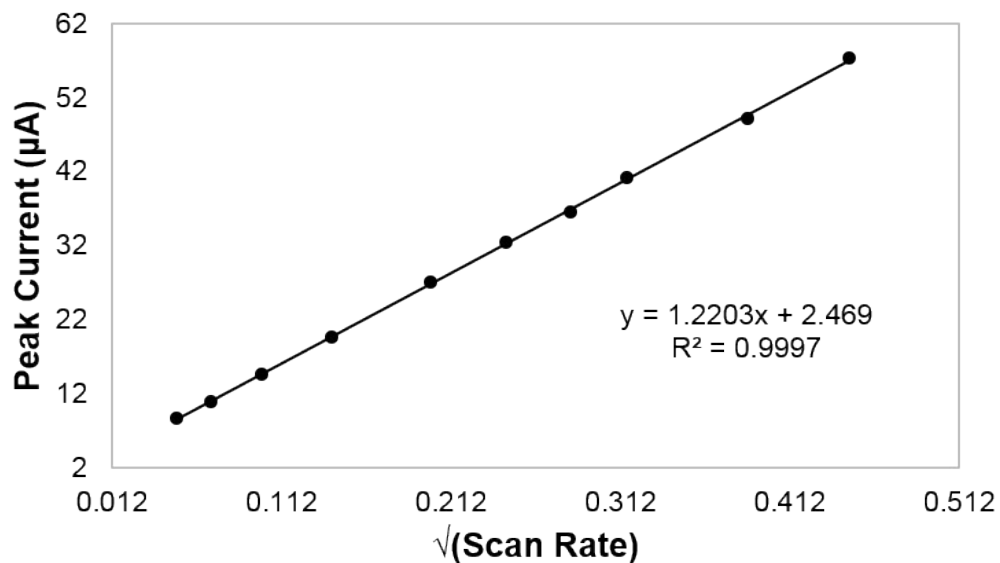

**Figure S13.** Plot of peak current versus the square root of the scan rate. The linear relationship indicates a freely diffusing species contributing to the observed electrochemical event.



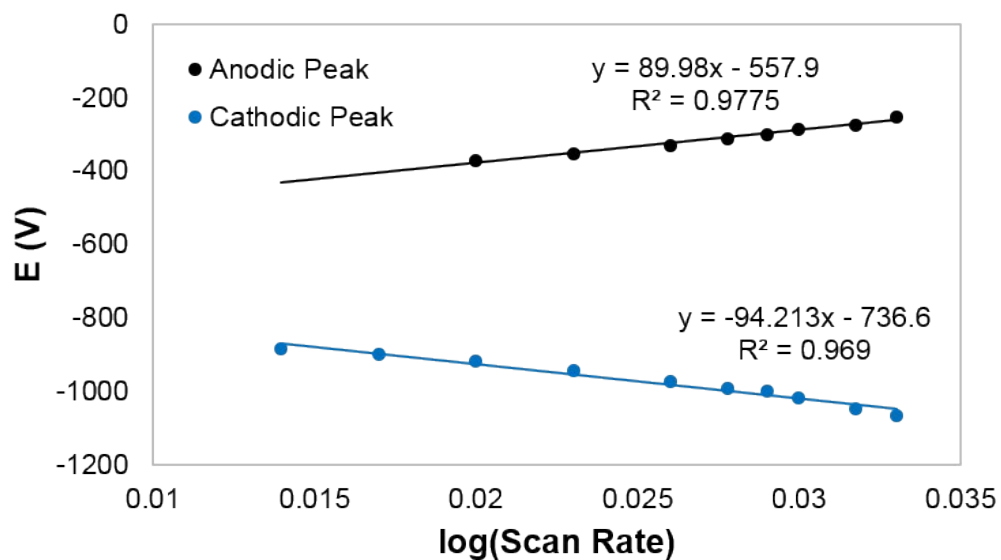

**Figure S14.** Laviron “trumpet” plot showing how the potential of the peak current changes as a function of scan rate for both the anodic and cathodic waves. The potential of the anodic peak shifts positively and the potential of the cathodic peak shifts negatively with increasing scan rates.

## Crystal Structure of 2

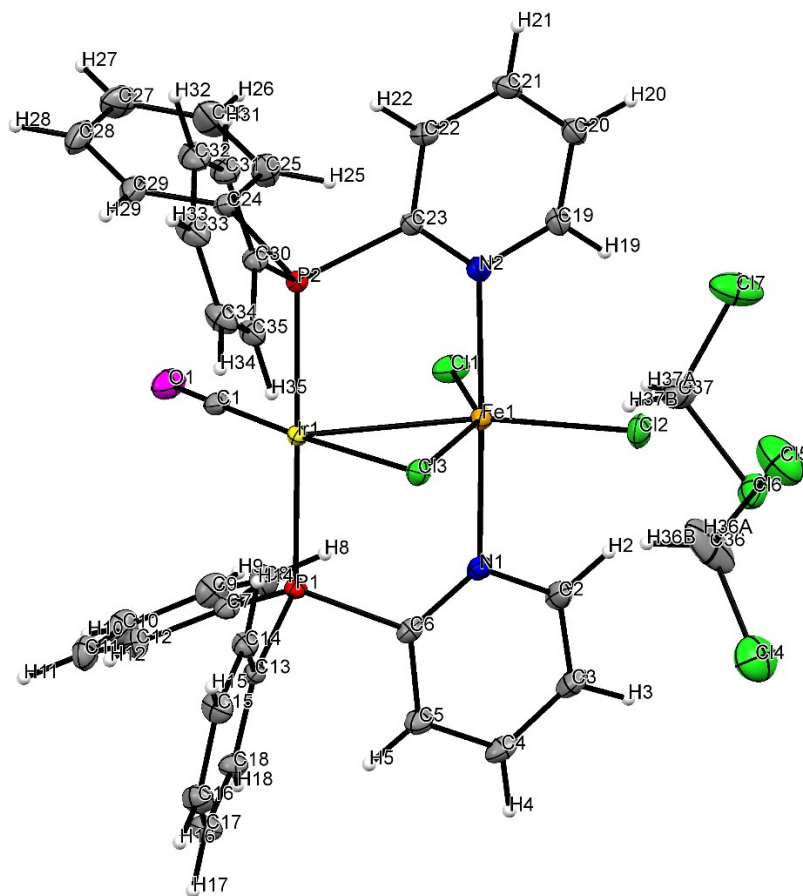

**Figure S15.** Molecular structure of **2** shown with 50% probability ellipsoids.

An orange prism-like specimen of  $C_{37}H_{32}Cl_7FeIrN_2OP_2$ , approximate dimensions 0.050 mm x 0.050 mm x 0.122 mm, was used for the X-ray crystallographic analysis. The X-ray intensity data were measured on a Bruker APEX DUO system equipped with a fine-focus tube ( $MoK\alpha$ ,  $\lambda = 0.71073 \text{ \AA}$ ) and a TRIUMPH curved-crystal monochromator.

The frames were integrated with the Bruker SAINT software package using a SAINT V8.38A (Bruker AXS, 2013) algorithm. The integration of the data using a monoclinic unit cell yielded a total of 99986 reflections to a maximum  $\theta$  angle of  $31.55^\circ$  ( $0.68 \text{ \AA}$  resolution), of which 12805 were independent (average redundancy 7.808, completeness = 95.4%,  $R_{int} = 4.17\%$ ,  $R_{sig} = 2.50\%$ ) and 11585 (90.47%) were greater than  $2\sigma(F^2)$ . The final cell constants of  $a = 9.706(3) \text{ \AA}$ ,  $b = 16.933(4) \text{ \AA}$ ,  $c = 24.815(6) \text{ \AA}$ ,  $\beta = 100.009(4)^\circ$ , volume =  $4016.3(18) \text{ \AA}^3$ , are based upon the refinement of the XYZ-centroids of reflections above  $20 \sigma(I)$ . Data were corrected for absorption effects using the multi-scan method (SADABS).

The structure was solved and refined using the Bruker SHELXTL Software Package, using the space group  $P 1 21/n 1$ , with  $Z = 4$  for the formula unit,  $C_{37}H_{32}Cl_7FeIrN_2OP_2$ . The final anisotropic full-matrix least-squares refinement on  $F^2$  with 509 variables converged at  $R1 = 2.36\%$ , for the observed data and  $wR2 = 5.86\%$  for all data. The goodness-of-fit was 1.043. The largest peak in the final difference electron density synthesis was  $0.792 \text{ e}/\text{\AA}^3$  and the largest hole was  $-1.041 \text{ e}/\text{\AA}^3$  with an RMS deviation of  $0.105 \text{ e}/\text{\AA}^3$ . On the basis of the final model, the calculated density was  $1.784 \text{ g}/\text{cm}^3$  and  $F(000)$ , 2112 e $^-$ .

**Table S2.** Sample and crystal data for **2**.

|                        |                                                                                    |                 |
|------------------------|------------------------------------------------------------------------------------|-----------------|
| Identification code    | IrFe                                                                               |                 |
| Chemical formula       | C <sub>37</sub> H <sub>32</sub> Cl <sub>7</sub> FeIrN <sub>2</sub> OP <sub>2</sub> |                 |
| Formula weight         | 1078.78 g/mol                                                                      |                 |
| Temperature            | 100(2) K                                                                           |                 |
| Wavelength             | 0.71073 Å                                                                          |                 |
| Crystal size           | 0.050 x 0.050 x 0.122 mm                                                           |                 |
| Crystal habit          | orange prism                                                                       |                 |
| Crystal system         | monoclinic                                                                         |                 |
| Space group            | P 1 21/n 1                                                                         |                 |
| Unit cell dimensions   | a = 9.706(3) Å                                                                     | α = 90°         |
|                        | b = 16.933(4) Å                                                                    | β = 100.009(4)° |
|                        | c = 24.815(6) Å                                                                    | γ = 90°         |
| Volume                 | 4016.3(18) Å <sup>3</sup>                                                          |                 |
| Z                      | 4                                                                                  |                 |
| Density (calculated)   | 1.784 g/cm <sup>3</sup>                                                            |                 |
| Absorption coefficient | 4.250 mm <sup>-1</sup>                                                             |                 |
| F(000)                 | 2112                                                                               |                 |

**Table S3.** Data collection and structure refinement for **2**.

|                                   |                                                                                                                                                                       |                           |
|-----------------------------------|-----------------------------------------------------------------------------------------------------------------------------------------------------------------------|---------------------------|
| Diffractometer                    | Bruker APEX DUO                                                                                                                                                       |                           |
| Radiation source                  | fine-focus tube (MoKα, λ = 0.71073 Å)                                                                                                                                 |                           |
| Theta range for data collection   | 1.46 to 31.55°                                                                                                                                                        |                           |
| Index ranges                      | -14 ≤ h ≤ 14, -23 ≤ k ≤ 24, -36 ≤ l ≤ 36                                                                                                                              |                           |
| Reflections collected             | 99986                                                                                                                                                                 |                           |
| Independent reflections           | 12805 [R(int) = 0.0417]                                                                                                                                               |                           |
| Absorption correction             | multi-scan                                                                                                                                                            |                           |
| Structure solution technique      | direct methods                                                                                                                                                        |                           |
| Structure solution program        | SHELXTL XT 2014/5 (Bruker AXS, 2014)                                                                                                                                  |                           |
| Refinement method                 | Full-matrix least-squares on F <sup>2</sup>                                                                                                                           |                           |
| Refinement program                | SHELXTL XL 2017/1 (Bruker AXS, 2017)                                                                                                                                  |                           |
| Function minimized                | Σ w(F <sub>o</sub> <sup>2</sup> - F <sub>c</sub> <sup>2</sup> ) <sup>2</sup>                                                                                          |                           |
| Data / restraints / parameters    | 12805 / 13 / 509                                                                                                                                                      |                           |
| Goodness-of-fit on F <sup>2</sup> | 1.043                                                                                                                                                                 |                           |
| Δ/σ <sub>max</sub>                | 0.001                                                                                                                                                                 |                           |
| Final R indices                   | 11585 data; I > 2σ(I)                                                                                                                                                 | R1 = 0.0236, wR2 = 0.0570 |
|                                   | all data                                                                                                                                                              | R1 = 0.0286, wR2 = 0.0586 |
| Weighting scheme                  | w = 1/[σ <sup>2</sup> (F <sub>o</sub> <sup>2</sup> ) + (0.0243P) <sup>2</sup> + 7.1070P]<br>where P = (F <sub>o</sub> <sup>2</sup> + 2F <sub>c</sub> <sup>2</sup> )/3 |                           |
| Largest diff. peak and hole       | 0.792 and -1.041 eÅ <sup>-3</sup>                                                                                                                                     |                           |
| R.M.S. deviation from mean        | 0.105 eÅ <sup>-3</sup>                                                                                                                                                |                           |

**Table S4.** Atomic coordinates and equivalent isotropic atomic displacement parameters (Å<sup>2</sup>) for **2**.

| x/a | y/b | z/c | U(eq) |
|-----|-----|-----|-------|
|-----|-----|-----|-------|

|     | <b>x/a</b> | <b>y/b</b>  | <b>z/c</b>  | <b>U(eq)</b> |
|-----|------------|-------------|-------------|--------------|
| C1  | 0.7901(2)  | 0.62978(13) | 0.44865(9)  | 0.0136(4)    |
| C2  | 0.5266(2)  | 0.48763(15) | 0.25016(10) | 0.0184(4)    |
| C3  | 0.5031(3)  | 0.40828(15) | 0.24003(10) | 0.0200(5)    |
| C4  | 0.5939(3)  | 0.35351(14) | 0.26874(10) | 0.0189(5)    |
| C5  | 0.7021(3)  | 0.38165(14) | 0.30838(10) | 0.0167(4)    |
| C6  | 0.7172(2)  | 0.46272(13) | 0.31755(9)  | 0.0126(4)    |
| C7  | 0.7781(2)  | 0.45005(13) | 0.43172(9)  | 0.0119(4)    |
| C8  | 0.6337(2)  | 0.45087(15) | 0.43132(10) | 0.0175(4)    |
| C9  | 0.5792(3)  | 0.41599(16) | 0.47391(10) | 0.0208(5)    |
| C10 | 0.6682(3)  | 0.38128(16) | 0.51748(10) | 0.0214(5)    |
| C11 | 0.8115(3)  | 0.38184(16) | 0.51836(10) | 0.0208(5)    |
| C12 | 0.8671(2)  | 0.41651(14) | 0.47585(9)  | 0.0161(4)    |
| C13 | 0.0111(2)  | 0.45340(13) | 0.37199(9)  | 0.0116(4)    |
| C14 | 0.1218(2)  | 0.50126(14) | 0.36250(9)  | 0.0148(4)    |
| C15 | 0.2500(2)  | 0.46842(15) | 0.35696(11) | 0.0189(5)    |
| C16 | 0.2696(3)  | 0.38717(15) | 0.36125(11) | 0.0197(5)    |
| C17 | 0.1604(3)  | 0.33880(14) | 0.37158(10) | 0.0182(4)    |
| C18 | 0.0325(2)  | 0.37136(13) | 0.37746(10) | 0.0150(4)    |
| C19 | 0.5377(2)  | 0.81871(14) | 0.27151(9)  | 0.0161(4)    |
| C20 | 0.5292(3)  | 0.90034(14) | 0.26734(10) | 0.0177(4)    |
| C21 | 0.6320(3)  | 0.94593(14) | 0.29841(10) | 0.0188(5)    |
| C22 | 0.7368(2)  | 0.90764(14) | 0.33437(9)  | 0.0161(4)    |
| C23 | 0.7370(2)  | 0.82528(13) | 0.33735(9)  | 0.0125(4)    |
| C24 | 0.7971(2)  | 0.80851(13) | 0.45253(9)  | 0.0151(4)    |
| C25 | 0.6534(3)  | 0.81628(17) | 0.45150(10) | 0.0223(5)    |
| C26 | 0.6030(3)  | 0.83636(19) | 0.49870(12) | 0.0307(6)    |
| C27 | 0.6959(4)  | 0.84889(17) | 0.54726(12) | 0.0307(6)    |
| C28 | 0.8385(3)  | 0.84040(17) | 0.54889(11) | 0.0281(6)    |
| C29 | 0.8895(3)  | 0.81938(15) | 0.50163(10) | 0.0202(5)    |
| C30 | 0.0283(2)  | 0.82080(13) | 0.39370(9)  | 0.0135(4)    |
| C31 | 0.0554(2)  | 0.89752(14) | 0.41475(10) | 0.0181(4)    |
| C32 | 0.1852(3)  | 0.93246(15) | 0.41540(11) | 0.0222(5)    |
| C33 | 0.2903(3)  | 0.89119(16) | 0.39544(12) | 0.0235(5)    |
| C34 | 0.2653(2)  | 0.81525(15) | 0.37503(11) | 0.0202(5)    |
| C35 | 0.1346(2)  | 0.78032(14) | 0.37436(10) | 0.0164(4)    |
| Cl1 | 0.45530(6) | 0.64322(3)  | 0.34725(3)  | 0.01989(11)  |
| Cl2 | 0.56907(6) | 0.66240(4)  | 0.19969(2)  | 0.02142(11)  |
| Cl3 | 0.90013(6) | 0.64590(3)  | 0.29233(2)  | 0.01370(9)   |
| Fe1 | 0.63379(3) | 0.64856(2)  | 0.29558(2)  | 0.01168(6)   |
| Ir1 | 0.85233(2) | 0.63678(2)  | 0.38305(2)  | 0.00924(3)   |
| N1  | 0.6320(2)  | 0.51592(11) | 0.28808(8)  | 0.0139(3)    |
| N2  | 0.6403(2)  | 0.78060(11) | 0.30518(8)  | 0.0133(3)    |
| O1  | 0.7479(2)  | 0.62533(11) | 0.48877(7)  | 0.0218(4)    |
| P1  | 0.84410(6) | 0.49980(3)  | 0.37624(2)  | 0.01023(10)  |

|      | x/a        | y/b         | z/c        | U(eq)       |
|------|------------|-------------|------------|-------------|
| P2   | 0.85848(6) | 0.77352(3)  | 0.39134(2) | 0.01056(10) |
| C36  | 0.802(3)   | 0.6328(7)   | 0.1087(5)  | 0.057(6)    |
| Cl4  | 0.8248(8)  | 0.5504(3)   | 0.0677(3)  | 0.0426(12)  |
| Cl5  | 0.7777(6)  | 0.7203(4)   | 0.0706(4)  | 0.0465(12)  |
| C36A | 0.820(2)   | 0.6338(6)   | 0.1103(5)  | 0.029(3)    |
| Cl4A | 0.777(3)   | 0.5564(5)   | 0.0611(3)  | 0.071(3)    |
| Cl5A | 0.8032(18) | 0.7270(5)   | 0.0785(5)  | 0.0519(19)  |
| C37  | 0.2065(12) | 0.6221(4)   | 0.2333(4)  | 0.0260(14)  |
| Cl6  | 0.1751(8)  | 0.5479(3)   | 0.1825(4)  | 0.0251(5)   |
| Cl7  | 0.1587(6)  | 0.71769(11) | 0.2083(2)  | 0.0381(7)   |
| C37A | 0.214(4)   | 0.6388(10)  | 0.2305(12) | 0.0260(14)  |
| Cl6A | 0.1763(13) | 0.5495(6)   | 0.1950(3)  | 0.0251(5)   |
| Cl7A | 0.1164(19) | 0.7146(4)   | 0.1923(8)  | 0.0381(7)   |
| C37B | 0.195(3)   | 0.6458(16)  | 0.2138(14) | 0.0260(14)  |
| Cl6B | 0.188(4)   | 0.5518(15)  | 0.182(2)   | 0.0251(5)   |
| Cl7B | 0.0735(18) | 0.7090(5)   | 0.1744(8)  | 0.0381(7)   |

**Table S5.** Bond lengths (Å) for **2**.

|         |          |         |          |
|---------|----------|---------|----------|
| C1-O1   | 1.143(3) | C1-Ir1  | 1.836(2) |
| C2-N1   | 1.352(3) | C2-C3   | 1.379(3) |
| C2-H2   | 0.95     | C3-C4   | 1.388(4) |
| C3-H3   | 0.95     | C4-C5   | 1.392(3) |
| C4-H4   | 0.95     | C5-C6   | 1.395(3) |
| C5-H5   | 0.95     | C6-N1   | 1.349(3) |
| C6-P1   | 1.846(2) | C7-C12  | 1.392(3) |
| C7-C8   | 1.400(3) | C7-P1   | 1.823(2) |
| C8-C9   | 1.393(3) | C8-H8   | 0.95     |
| C9-C10  | 1.391(4) | C9-H9   | 0.95     |
| C10-C11 | 1.387(4) | C10-H10 | 0.95     |
| C11-C12 | 1.395(3) | C11-H11 | 0.95     |
| C12-H12 | 0.95     | C13-C14 | 1.399(3) |
| C13-C18 | 1.408(3) | C13-P1  | 1.821(2) |
| C14-C15 | 1.391(3) | C14-H14 | 0.95     |
| C15-C16 | 1.390(4) | C15-H15 | 0.95     |
| C16-C17 | 1.398(3) | C16-H16 | 0.95     |
| C17-C18 | 1.389(3) | C17-H17 | 0.95     |
| C18-H18 | 0.95     | C19-N2  | 1.348(3) |
| C19-C20 | 1.388(3) | C19-H19 | 0.95     |
| C20-C21 | 1.385(4) | C20-H20 | 0.95     |
| C21-C22 | 1.391(3) | C21-H21 | 0.95     |
| C22-C23 | 1.397(3) | C22-H22 | 0.95     |
| C23-N2  | 1.353(3) | C23-P2  | 1.845(2) |
| C24-C29 | 1.394(3) | C24-C25 | 1.397(3) |
| C24-P2  | 1.823(2) | C25-C26 | 1.388(3) |

|           |           |           |           |
|-----------|-----------|-----------|-----------|
| C25-H25   | 0.95      | C26-C27   | 1.390(5)  |
| C26-H26   | 0.95      | C27-C28   | 1.385(5)  |
| C27-H27   | 0.95      | C28-C29   | 1.396(4)  |
| C28-H28   | 0.95      | C29-H29   | 0.95      |
| C30-C35   | 1.392(3)  | C30-C31   | 1.408(3)  |
| C30-P2    | 1.824(2)  | C31-C32   | 1.390(3)  |
| C31-H31   | 0.95      | C32-C33   | 1.396(4)  |
| C32-H32   | 0.95      | C33-C34   | 1.388(4)  |
| C33-H33   | 0.95      | C34-C35   | 1.397(3)  |
| C34-H34   | 0.95      | C35-H35   | 0.95      |
| Cl1-Fe1   | 2.3293(8) | Cl2-Fe1   | 2.3648(9) |
| Cl3-Ir1   | 2.3814(8) | Cl3-Fe1   | 2.6007(9) |
| Fe1-N2    | 2.248(2)  | Fe1-N1    | 2.254(2)  |
| Fe1-Ir1   | 2.7660(6) | Ir1-P2    | 2.3243(8) |
| Ir1-P1    | 2.3261(8) | C36-Cl5   | 1.753(10) |
| C36-Cl4   | 1.763(11) | C36-H36A  | 0.99      |
| C36-H36B  | 0.99      | C36A-Cl5A | 1.761(10) |
| C36A-Cl4A | 1.792(10) | C36A-H36C | 0.99      |
| C36A-H36D | 0.99      | C37-Cl7   | 1.766(6)  |
| C37-Cl6   | 1.770(7)  | C37-H37A  | 0.99      |
| C37-H37B  | 0.99      | C37A-Cl6A | 1.756(15) |
| C37A-Cl7A | 1.771(16) | C37A-H37C | 0.99      |
| C37A-H37D | 0.99      | C37B-Cl7B | 1.758(17) |
| C37B-Cl6B | 1.770(16) | C37B-H37E | 0.99      |
| C37B-H37F | 0.99      |           |           |

**Table S6.** Bond angles (°) for **2**.

|             |            |             |            |
|-------------|------------|-------------|------------|
| O1-C1-Ir1   | 178.2(2)   | N1-C2-C3    | 123.6(2)   |
| N1-C2-H2    | 118.2      | C3-C2-H2    | 118.2      |
| C2-C3-C4    | 119.1(2)   | C2-C3-H3    | 120.4      |
| C4-C3-H3    | 120.4      | C3-C4-C5    | 117.9(2)   |
| C3-C4-H4    | 121.0      | C5-C4-H4    | 121.0      |
| C4-C5-C6    | 119.8(2)   | C4-C5-H5    | 120.1      |
| C6-C5-H5    | 120.1      | N1-C6-C5    | 122.1(2)   |
| N1-C6-P1    | 117.55(16) | C5-C6-P1    | 120.01(18) |
| C12-C7-C8   | 119.5(2)   | C12-C7-P1   | 122.11(17) |
| C8-C7-P1    | 118.21(17) | C9-C8-C7    | 120.2(2)   |
| C9-C8-H8    | 119.9      | C7-C8-H8    | 119.9      |
| C10-C9-C8   | 120.1(2)   | C10-C9-H9   | 119.9      |
| C8-C9-H9    | 119.9      | C11-C10-C9  | 119.7(2)   |
| C11-C10-H10 | 120.2      | C9-C10-H10  | 120.2      |
| C10-C11-C12 | 120.6(2)   | C10-C11-H11 | 119.7      |
| C12-C11-H11 | 119.7      | C7-C12-C11  | 119.9(2)   |

|             |            |             |             |
|-------------|------------|-------------|-------------|
| C7-C12-H12  | 120.1      | C11-C12-H12 | 120.1       |
| C14-C13-C18 | 118.9(2)   | C14-C13-P1  | 118.54(17)  |
| C18-C13-P1  | 122.55(17) | C15-C14-C13 | 120.8(2)    |
| C15-C14-H14 | 119.6      | C13-C14-H14 | 119.6       |
| C16-C15-C14 | 120.1(2)   | C16-C15-H15 | 120.0       |
| C14-C15-H15 | 120.0      | C15-C16-C17 | 119.7(2)    |
| C15-C16-H16 | 120.2      | C17-C16-H16 | 120.2       |
| C18-C17-C16 | 120.5(2)   | C18-C17-H17 | 119.8       |
| C16-C17-H17 | 119.8      | C17-C18-C13 | 120.1(2)    |
| C17-C18-H18 | 120.0      | C13-C18-H18 | 120.0       |
| N2-C19-C20  | 123.5(2)   | N2-C19-H19  | 118.3       |
| C20-C19-H19 | 118.3      | C21-C20-C19 | 119.0(2)    |
| C21-C20-H20 | 120.5      | C19-C20-H20 | 120.5       |
| C20-C21-C22 | 118.2(2)   | C20-C21-H21 | 120.9       |
| C22-C21-H21 | 120.9      | C21-C22-C23 | 119.6(2)    |
| C21-C22-H22 | 120.2      | C23-C22-H22 | 120.2       |
| N2-C23-C22  | 122.2(2)   | N2-C23-P2   | 116.94(16)  |
| C22-C23-P2  | 120.50(17) | C29-C24-C25 | 119.5(2)    |
| C29-C24-P2  | 121.15(19) | C25-C24-P2  | 119.01(18)  |
| C26-C25-C24 | 120.3(3)   | C26-C25-H25 | 119.8       |
| C24-C25-H25 | 119.8      | C25-C26-C27 | 119.9(3)    |
| C25-C26-H26 | 120.1      | C27-C26-H26 | 120.1       |
| C28-C27-C26 | 120.3(2)   | C28-C27-H27 | 119.9       |
| C26-C27-H27 | 119.9      | C27-C28-C29 | 120.0(3)    |
| C27-C28-H28 | 120.0      | C29-C28-H28 | 120.0       |
| C24-C29-C28 | 120.0(3)   | C24-C29-H29 | 120.0       |
| C28-C29-H29 | 120.0      | C35-C30-C31 | 118.7(2)    |
| C35-C30-P2  | 119.52(17) | C31-C30-P2  | 121.76(17)  |
| C32-C31-C30 | 120.5(2)   | C32-C31-H31 | 119.7       |
| C30-C31-H31 | 119.7      | C31-C32-C33 | 120.0(2)    |
| C31-C32-H32 | 120.0      | C33-C32-H32 | 120.0       |
| C34-C33-C32 | 120.1(2)   | C34-C33-H33 | 120.0       |
| C32-C33-H33 | 120.0      | C33-C34-C35 | 119.8(2)    |
| C33-C34-H34 | 120.1      | C35-C34-H34 | 120.1       |
| C30-C35-C34 | 120.9(2)   | C30-C35-H35 | 119.6       |
| C34-C35-H35 | 119.6      | Ir1-Cl3-Fe1 | 67.280(16)  |
| N2-Fe1-N1   | 178.37(7)  | N2-Fe1-Cl1  | 89.44(5)    |
| N1-Fe1-Cl1  | 90.63(5)   | N2-Fe1-Cl2  | 90.33(5)    |
| N1-Fe1-Cl2  | 91.07(5)   | Cl1-Fe1-Cl2 | 117.70(3)   |
| N2-Fe1-Cl3  | 90.61(5)   | N1-Fe1-Cl3  | 88.48(5)    |
| Cl1-Fe1-Cl3 | 148.74(3)  | Cl2-Fe1-Cl3 | 93.56(2)    |
| N2-Fe1-Ir1  | 89.14(5)   | N1-Fe1-Ir1  | 89.24(5)    |
| Cl1-Fe1-Ir1 | 96.17(3)   | Cl2-Fe1-Ir1 | 146.12(2)   |
| Cl3-Fe1-Ir1 | 52.574(19) | C1-Ir1-P2   | 89.61(7)    |
| C1-Ir1-P1   | 89.29(7)   | P2-Ir1-P1   | 178.897(19) |

|                |            |                |            |
|----------------|------------|----------------|------------|
| C1-Ir1-Cl3     | 172.16(7)  | P2-Ir1-Cl3     | 90.735(19) |
| P1-Ir1-Cl3     | 90.329(18) | C1-Ir1-Fe1     | 112.03(7)  |
| P2-Ir1-Fe1     | 90.112(15) | P1-Ir1-Fe1     | 90.166(15) |
| Cl3-Ir1-Fe1    | 60.15(2)   | C6-N1-C2       | 117.3(2)   |
| C6-N1-Fe1      | 128.73(15) | C2-N1-Fe1      | 113.87(16) |
| C19-N2-C23     | 117.4(2)   | C19-N2-Fe1     | 113.98(15) |
| C23-N2-Fe1     | 128.52(15) | C13-P1-C7      | 106.11(10) |
| C13-P1-C6      | 106.63(10) | C7-P1-C6       | 99.49(10)  |
| C13-P1-Ir1     | 114.51(7)  | C7-P1-Ir1      | 114.71(7)  |
| C6-P1-Ir1      | 113.97(7)  | C24-P2-C30     | 104.75(11) |
| C24-P2-C23     | 100.97(10) | C30-P2-C23     | 105.95(10) |
| C24-P2-Ir1     | 112.97(8)  | C30-P2-Ir1     | 116.69(8)  |
| C23-P2-Ir1     | 113.93(7)  | Cl5-C36-Cl4    | 112.1(7)   |
| Cl5-C36-H36A   | 109.2      | Cl4-C36-H36A   | 109.2      |
| Cl5-C36-H36B   | 109.2      | Cl4-C36-H36B   | 109.2      |
| H36A-C36-H36B  | 107.9      | Cl5A-C36A-Cl4A | 111.0(7)   |
| Cl5A-C36A-H36C | 109.4      | Cl4A-C36A-H36C | 109.4      |
| Cl5A-C36A-H36D | 109.4      | Cl4A-C36A-H36D | 109.4      |
| H36C-C36A-H36D | 108.0      | Cl7-C37-Cl6    | 113.5(5)   |
| Cl7-C37-H37A   | 108.9      | Cl6-C37-H37A   | 108.9      |
| Cl7-C37-H37B   | 108.9      | Cl6-C37-H37B   | 108.9      |
| H37A-C37-H37B  | 107.7      | Cl6A-C37A-Cl7A | 108.1(11)  |
| Cl6A-C37A-H37C | 110.1      | Cl7A-C37A-H37C | 110.1      |
| Cl6A-C37A-H37D | 110.1      | Cl7A-C37A-H37D | 110.1      |
| H37C-C37A-H37D | 108.4      | Cl7B-C37B-Cl6B | 109.2(17)  |
| Cl7B-C37B-H37E | 109.8      | Cl6B-C37B-H37E | 109.8      |
| Cl7B-C37B-H37F | 109.8      | Cl6B-C37B-H37F | 109.8      |
| H37E-C37B-H37F | 108.3      |                |            |

**Table S7.** Torsion angles (°) for **2**.

|                 |             |                 |             |
|-----------------|-------------|-----------------|-------------|
| N1-C2-C3-C4     | -2.1(4)     | C2-C3-C4-C5     | 2.7(4)      |
| C3-C4-C5-C6     | -0.8(4)     | C4-C5-C6-N1     | -1.8(3)     |
| C4-C5-C6-P1     | 171.43(18)  | C12-C7-C8-C9    | -2.1(4)     |
| P1-C7-C8-C9     | -177.75(19) | C7-C8-C9-C10    | 1.0(4)      |
| C8-C9-C10-C11   | 0.2(4)      | C9-C10-C11-C12  | -0.3(4)     |
| C8-C7-C12-C11   | 2.0(3)      | P1-C7-C12-C11   | 177.46(19)  |
| C10-C11-C12-C7  | -0.8(4)     | C18-C13-C14-C15 | 1.8(3)      |
| P1-C13-C14-C15  | -177.69(18) | C13-C14-C15-C16 | -0.5(4)     |
| C14-C15-C16-C17 | -0.5(4)     | C15-C16-C17-C18 | 0.1(4)      |
| C16-C17-C18-C13 | 1.2(4)      | C14-C13-C18-C17 | -2.2(3)     |
| P1-C13-C18-C17  | 177.31(18)  | N2-C19-C20-C21  | 1.2(4)      |
| C19-C20-C21-C22 | -2.7(3)     | C20-C21-C22-C23 | 1.2(3)      |
| C21-C22-C23-N2  | 1.9(3)      | C21-C22-C23-P2  | -171.08(18) |
| C29-C24-C25-C26 | 1.4(4)      | P2-C24-C25-C26  | 174.6(2)    |
| C24-C25-C26-C27 | 0.1(5)      | C25-C26-C27-C28 | -0.8(5)     |



|                 |             |                 |             |
|-----------------|-------------|-----------------|-------------|
| C26-C27-C28-C29 | 0.2(4)      | C25-C24-C29-C28 | -2.1(4)     |
| P2-C24-C29-C28  | -175.1(2)   | C27-C28-C29-C24 | 1.3(4)      |
| C35-C30-C31-C32 | 1.0(4)      | P2-C30-C31-C32  | -179.17(19) |
| C30-C31-C32-C33 | -0.5(4)     | C31-C32-C33-C34 | -0.1(4)     |
| C32-C33-C34-C35 | 0.2(4)      | C31-C30-C35-C34 | -0.9(3)     |
| P2-C30-C35-C34  | 179.25(19)  | C33-C34-C35-C30 | 0.3(4)      |
| C5-C6-N1-C2     | 2.5(3)      | P1-C6-N1-C2     | -170.93(17) |
| C5-C6-N1-Fe1    | 179.33(16)  | P1-C6-N1-Fe1    | 5.9(3)      |
| C3-C2-N1-C6     | -0.5(4)     | C3-C2-N1-Fe1    | -177.8(2)   |
| C20-C19-N2-C23  | 1.8(3)      | C20-C19-N2-Fe1  | -174.34(18) |
| C22-C23-N2-C19  | -3.4(3)     | P2-C23-N2-C19   | 169.84(16)  |
| C22-C23-N2-Fe1  | 172.15(16)  | P2-C23-N2-Fe1   | -14.6(3)    |
| C14-C13-P1-C7   | -139.71(18) | C18-C13-P1-C7   | 40.8(2)     |
| C14-C13-P1-C6   | 114.90(18)  | C18-C13-P1-C6   | -64.6(2)    |
| C14-C13-P1-Ir1  | -12.1(2)    | C18-C13-P1-Ir1  | 168.39(16)  |
| C12-C7-P1-C13   | 28.6(2)     | C8-C7-P1-C13    | -155.93(18) |
| C12-C7-P1-C6    | 139.10(19)  | C8-C7-P1-C6     | -45.4(2)    |
| C12-C7-P1-Ir1   | -98.87(19)  | C8-C7-P1-Ir1    | 76.61(19)   |
| N1-C6-P1-C13    | -134.20(17) | C5-C6-P1-C13    | 52.3(2)     |
| N1-C6-P1-C7     | 115.71(18)  | C5-C6-P1-C7     | -57.8(2)    |
| N1-C6-P1-Ir1    | -6.85(19)   | C5-C6-P1-Ir1    | 179.60(16)  |
| C29-C24-P2-C30  | -37.3(2)    | C25-C24-P2-C30  | 149.6(2)    |
| C29-C24-P2-C23  | -147.2(2)   | C25-C24-P2-C23  | 39.7(2)     |
| C29-C24-P2-Ir1  | 90.7(2)     | C25-C24-P2-Ir1  | -82.3(2)    |
| C35-C30-P2-C24  | 145.16(19)  | C31-C30-P2-C24  | -34.7(2)    |
| C35-C30-P2-C23  | -108.59(19) | C31-C30-P2-C23  | 71.5(2)     |
| C35-C30-P2-Ir1  | 19.4(2)     | C31-C30-P2-Ir1  | -160.45(17) |
| N2-C23-P2-C24   | -109.61(18) | C22-C23-P2-C24  | 63.7(2)     |
| N2-C23-P2-C30   | 141.42(17)  | C22-C23-P2-C30  | -45.3(2)    |
| N2-C23-P2-Ir1   | 11.78(19)   | C22-C23-P2-Ir1  | -174.89(16) |

**Table S8.** Anisotropic atomic displacement parameters ( $\text{\AA}^2$ ) for **2**.

The anisotropic atomic displacement factor exponent takes the form:  $-2\pi^2 [ h^2 a^{*2} U_{11} + \dots + 2 h k a^* b^* U_{12} ]$

|     | $U_{11}$   | $U_{22}$   | $U_{33}$   | $U_{23}$    | $U_{13}$   | $U_{12}$    |
|-----|------------|------------|------------|-------------|------------|-------------|
| C1  | 0.0157(10) | 0.0104(9)  | 0.0149(10) | -0.0015(8)  | 0.0031(8)  | 0.0001(7)   |
| C2  | 0.0131(10) | 0.0209(11) | 0.0198(11) | -0.0055(9)  | -0.0010(8) | 0.0023(8)   |
| C3  | 0.0175(11) | 0.0219(12) | 0.0201(11) | -0.0094(9)  | 0.0022(9)  | -0.0042(9)  |
| C4  | 0.0225(12) | 0.0158(11) | 0.0196(11) | -0.0060(9)  | 0.0068(9)  | -0.0059(9)  |
| C5  | 0.0204(11) | 0.0135(10) | 0.0163(10) | -0.0007(8)  | 0.0032(8)  | -0.0028(8)  |
| C6  | 0.0131(9)  | 0.0131(10) | 0.0121(9)  | -0.0027(7)  | 0.0039(7)  | -0.0026(7)  |
| C7  | 0.0138(9)  | 0.0102(9)  | 0.0121(9)  | 0.0003(7)   | 0.0037(7)  | -0.0020(7)  |
| C8  | 0.0143(10) | 0.0202(11) | 0.0182(11) | 0.0012(9)   | 0.0035(8)  | -0.0001(8)  |
| C9  | 0.0183(11) | 0.0257(12) | 0.0207(11) | -0.0022(10) | 0.0097(9)  | -0.0047(9)  |
| C10 | 0.0259(12) | 0.0241(12) | 0.0164(11) | 0.0009(9)   | 0.0094(9)  | -0.0053(10) |
| C11 | 0.0254(12) | 0.0237(12) | 0.0130(10) | 0.0028(9)   | 0.0020(9)  | -0.0021(9)  |

|      |             |             |             |              |             |              |
|------|-------------|-------------|-------------|--------------|-------------|--------------|
| C12  | 0.0169(10)  | 0.0178(10)  | 0.0133(10)  | 0.0022(8)    | 0.0017(8)   | 0.0002(8)    |
| C13  | 0.0129(9)   | 0.0112(9)   | 0.0106(9)   | -0.0007(7)   | 0.0015(7)   | -0.0006(7)   |
| C14  | 0.0137(10)  | 0.0131(10)  | 0.0170(10)  | 0.0008(8)    | 0.0010(8)   | -0.0016(8)   |
| C15  | 0.0116(10)  | 0.0199(11)  | 0.0250(12)  | 0.0006(9)    | 0.0026(8)   | -0.0027(8)   |
| C16  | 0.0146(10)  | 0.0200(11)  | 0.0243(12)  | -0.0015(9)   | 0.0031(9)   | 0.0026(8)    |
| C17  | 0.0190(11)  | 0.0131(10)  | 0.0228(11)  | 0.0012(9)    | 0.0046(9)   | 0.0022(8)    |
| C18  | 0.0163(10)  | 0.0121(10)  | 0.0172(10)  | -0.0001(8)   | 0.0046(8)   | -0.0007(8)   |
| C19  | 0.0160(10)  | 0.0175(11)  | 0.0139(10)  | 0.0014(8)    | 0.0000(8)   | 0.0022(8)    |
| C20  | 0.0198(11)  | 0.0181(11)  | 0.0150(10)  | 0.0024(8)    | 0.0027(8)   | 0.0056(8)    |
| C21  | 0.0251(12)  | 0.0132(10)  | 0.0185(11)  | 0.0019(8)    | 0.0053(9)   | 0.0063(9)    |
| C22  | 0.0197(11)  | 0.0116(10)  | 0.0167(10)  | -0.0017(8)   | 0.0024(8)   | 0.0012(8)    |
| C23  | 0.0146(10)  | 0.0123(10)  | 0.0110(9)   | 0.0005(7)    | 0.0032(7)   | 0.0023(7)    |
| C24  | 0.0214(11)  | 0.0117(10)  | 0.0130(10)  | -0.0002(8)   | 0.0047(8)   | 0.0019(8)    |
| C25  | 0.0225(12)  | 0.0303(13)  | 0.0152(11)  | 0.0006(10)   | 0.0060(9)   | 0.0067(10)   |
| C26  | 0.0344(15)  | 0.0378(16)  | 0.0235(13)  | 0.0033(12)   | 0.0155(11)  | 0.0135(12)   |
| C27  | 0.0501(18)  | 0.0266(14)  | 0.0190(12)  | -0.0010(10)  | 0.0161(12)  | 0.0063(12)   |
| C28  | 0.0483(17)  | 0.0223(13)  | 0.0123(11)  | -0.0024(9)   | 0.0018(11)  | -0.0052(12)  |
| C29  | 0.0266(12)  | 0.0174(11)  | 0.0156(11)  | -0.0022(9)   | 0.0006(9)   | -0.0028(9)   |
| C30  | 0.0132(9)   | 0.0118(10)  | 0.0150(10)  | 0.0014(8)    | 0.0008(8)   | -0.0015(7)   |
| C31  | 0.0171(10)  | 0.0142(11)  | 0.0221(11)  | -0.0004(9)   | 0.0011(8)   | -0.0017(8)   |
| C32  | 0.0204(12)  | 0.0147(11)  | 0.0292(13)  | 0.0002(9)    | -0.0024(10) | -0.0043(9)   |
| C33  | 0.0152(11)  | 0.0184(11)  | 0.0352(14)  | 0.0062(10)   | -0.0002(10) | -0.0025(9)   |
| C34  | 0.0125(10)  | 0.0193(11)  | 0.0286(13)  | 0.0046(10)   | 0.0029(9)   | 0.0010(8)    |
| C35  | 0.0147(10)  | 0.0136(10)  | 0.0199(11)  | 0.0027(8)    | 0.0003(8)   | 0.0011(8)    |
| Cl1  | 0.0230(3)   | 0.0165(3)   | 0.0236(3)   | -0.0016(2)   | 0.0135(2)   | -0.0024(2)   |
| Cl2  | 0.0237(3)   | 0.0290(3)   | 0.0107(2)   | -0.0001(2)   | 0.0006(2)   | 0.0035(2)    |
| Cl3  | 0.0154(2)   | 0.0147(2)   | 0.0117(2)   | 0.00073(17)  | 0.00420(17) | 0.00027(17)  |
| Fe1  | 0.01198(14) | 0.01291(14) | 0.00993(13) | -0.00040(11) | 0.00126(11) | 0.00012(10)  |
| Ir1  | 0.00973(4)  | 0.00896(4)  | 0.00900(4)  | 0.00002(3)   | 0.00158(3)  | -0.00011(3)  |
| N1   | 0.0133(8)   | 0.0146(9)   | 0.0140(8)   | -0.0035(7)   | 0.0028(7)   | 0.0006(7)    |
| N2   | 0.0130(8)   | 0.0143(9)   | 0.0126(8)   | 0.0010(7)    | 0.0024(7)   | 0.0011(7)    |
| O1   | 0.0295(10)  | 0.0197(9)   | 0.0187(8)   | -0.0011(7)   | 0.0114(7)   | -0.0028(7)   |
| P1   | 0.0113(2)   | 0.0093(2)   | 0.0102(2)   | 0.00014(18)  | 0.00213(18) | -0.00089(18) |
| P2   | 0.0113(2)   | 0.0100(2)   | 0.0101(2)   | -0.00040(18) | 0.00107(18) | 0.00044(18)  |
| C36  | 0.074(11)   | 0.068(10)   | 0.039(7)    | 0.039(6)     | 0.034(7)    | 0.035(7)     |
| Cl4  | 0.059(3)    | 0.0386(13)  | 0.0325(16)  | 0.0121(10)   | 0.0157(13)  | -0.0032(12)  |
| Cl5  | 0.0341(19)  | 0.045(2)    | 0.059(3)    | 0.0185(15)   | 0.0061(15)  | 0.0006(12)   |
| C36A | 0.028(4)    | 0.028(6)    | 0.033(7)    | -0.002(5)    | 0.007(4)    | 0.008(4)     |
| Cl4A | 0.125(9)    | 0.048(2)    | 0.0408(18)  | 0.0120(14)   | 0.014(3)    | -0.012(4)    |
| Cl5A | 0.082(4)    | 0.0324(18)  | 0.049(3)    | 0.0148(16)   | 0.034(3)    | 0.022(2)     |
| C37  | 0.0230(19)  | 0.024(3)    | 0.030(2)    | -0.005(2)    | 0.0031(17)  | 0.004(3)     |
| Cl6  | 0.0275(10)  | 0.0245(5)   | 0.0209(10)  | -0.0007(10)  | -0.0025(15) | -0.0066(5)   |
| Cl7  | 0.0396(15)  | 0.0236(4)   | 0.0570(16)  | 0.0071(7)    | 0.0251(14)  | 0.0039(7)    |
| C37A | 0.0230(19)  | 0.024(3)    | 0.030(2)    | -0.005(2)    | 0.0031(17)  | 0.004(3)     |
| Cl6A | 0.0275(10)  | 0.0245(5)   | 0.0209(10)  | -0.0007(10)  | -0.0025(15) | -0.0066(5)   |

|      |            |           |            |             |             |            |
|------|------------|-----------|------------|-------------|-------------|------------|
| Cl7A | 0.0396(15) | 0.0236(4) | 0.0570(16) | 0.0071(7)   | 0.0251(14)  | 0.0039(7)  |
| C37B | 0.0230(19) | 0.024(3)  | 0.030(2)   | -0.005(2)   | 0.0031(17)  | 0.004(3)   |
| Cl6B | 0.0275(10) | 0.0245(5) | 0.0209(10) | -0.0007(10) | -0.0025(15) | -0.0066(5) |
| Cl7B | 0.0396(15) | 0.0236(4) | 0.0570(16) | 0.0071(7)   | 0.0251(14)  | 0.0039(7)  |

**Table S9.** Hydrogen atomic coordinates and isotropic atomic displacement parameters ( $\text{\AA}^2$ ) for **2**.

|      | x/a    | y/b    | z/c    | U(eq) |
|------|--------|--------|--------|-------|
| H2   | 0.4654 | 0.5245 | 0.2293 | 0.022 |
| H3   | 0.4256 | 0.3913 | 0.2137 | 0.024 |
| H4   | 0.5827 | 0.2986 | 0.2616 | 0.023 |
| H5   | 0.7654 | 0.3457 | 0.3291 | 0.02  |
| H8   | 0.5728 | 0.4753 | 0.4019 | 0.021 |
| H9   | 0.4810 | 0.4159 | 0.4732 | 0.025 |
| H10  | 0.6310 | 0.3573 | 0.5465 | 0.026 |
| H11  | 0.8723 | 0.3584 | 0.5482 | 0.025 |
| H12  | 0.9654 | 0.4172 | 0.4770 | 0.019 |
| H14  | 1.1094 | 0.5569 | 0.3598 | 0.018 |
| H15  | 1.3242 | 0.5015 | 0.3502 | 0.023 |
| H16  | 1.3569 | 0.3646 | 0.3572 | 0.024 |
| H17  | 1.1738 | 0.2833 | 0.3746 | 0.022 |
| H18  | 0.9594 | 0.3382 | 0.3852 | 0.018 |
| H19  | 0.4676 | 0.7881 | 0.2495 | 0.019 |
| H20  | 0.4539 | 0.9246 | 0.2435 | 0.021 |
| H21  | 0.6310 | 1.0018 | 0.2953 | 0.023 |
| H22  | 0.8077 | 0.9373 | 0.3567 | 0.019 |
| H25  | 0.5899 | 0.8078 | 0.4183 | 0.027 |
| H26  | 0.5052 | 0.8415 | 0.4978 | 0.037 |
| H27  | 0.6615 | 0.8633 | 0.5794 | 0.037 |
| H28  | 0.9016 | 0.8489 | 0.5822 | 0.034 |
| H29  | 0.9872 | 0.8125 | 0.5029 | 0.024 |
| H31  | 0.9844 | 0.9256 | 0.4286 | 0.022 |
| H32  | 1.2025 | 0.9844 | 0.4294 | 0.027 |
| H33  | 1.3790 | 0.9151 | 0.3958 | 0.028 |
| H34  | 1.3368 | 0.7871 | 0.3615 | 0.024 |
| H35  | 1.1181 | 0.7282 | 0.3605 | 0.02  |
| H36A | 0.7204 | 0.6238 | 0.1268 | 0.069 |
| H36B | 0.8859 | 0.6384 | 0.1377 | 0.069 |
| H36C | 0.7575 | 0.6309 | 0.1378 | 0.035 |
| H36D | 0.9175 | 0.6267 | 0.1296 | 0.035 |
| H37A | 0.1534 | 0.6092 | 0.2628 | 0.031 |
| H37B | 0.3072 | 0.6221 | 0.2495 | 0.031 |
| H37C | 0.3154 | 0.6504 | 0.2348 | 0.031 |
| H37D | 0.1885 | 0.6350 | 0.2673 | 0.031 |

|      | <b>x/a</b> | <b>y/b</b> | <b>z/c</b> | <b>U(eq)</b> |
|------|------------|------------|------------|--------------|
| H37E | 0.1731     | 0.6408     | 0.2511     | 0.031        |
| H37F | 0.2905     | 0.6680     | 0.2168     | 0.031        |

### Crystal Structure of 3

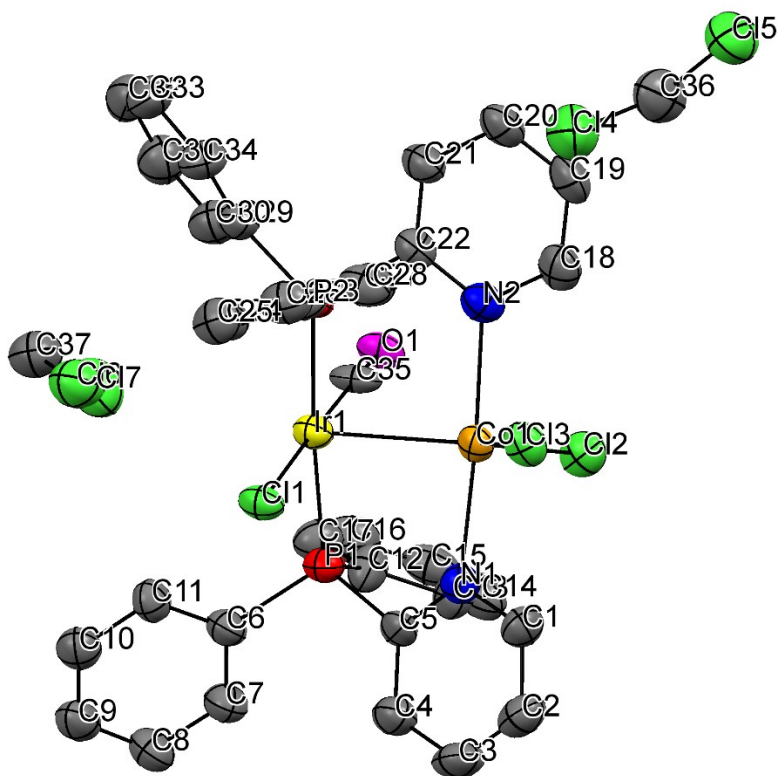

**Figure S16.** Molecular structure of **3** shown with 50% probability ellipsoids.

A pale green prism-like specimen of  $C_{37}H_{32}Cl_7CoIrN_2OP_2$ , approximate dimensions 0.390 mm x 0.494 mm x 0.497 mm, was used for the X-ray crystallographic analysis. The X-ray intensity data were measured on a Bruker APEX II CCD system equipped with a fine-focus tube (MoK $\alpha$ ,  $\lambda = 0.71073$  Å) and a TRIUMPH curved-crystal monochromator.

The integration of the data using a monoclinic unit cell yielded a total of 30888 reflections to a maximum  $\theta$  angle of 27.48° (0.77 Å resolution), of which 9186 were independent (average redundancy 3.363, completeness = 99.9%,  $R_{int} = 7.43\%$ ,  $R_{sig} = 7.89\%$ ) and 7574 (82.45%) were greater than  $2\sigma(F^2)$ . The final cell constants of  $a = 21.731(7)$  Å,  $b = 12.688(4)$  Å,  $c = 15.533(5)$  Å,  $\beta = 108.649(4)^\circ$ , volume = 4058.2) Å<sup>3</sup>, are based upon the refinement of the XYZ-centroids of 9599 reflections above  $20\sigma(I)$  with  $5.037^\circ < 2\theta < 55.09^\circ$ . Data were corrected for absorption effects using the Numerical Mu From Formula method (SADABS). The ratio of minimum to maximum apparent transmission was 0.037. The calculated minimum and maximum transmission coefficients (based on crystal size) are 0.0001 and 0.0027.

The structure was solved and refined using the Bruker SHELXTL Software Package, using the space group  $C 1 c 1$ , with  $Z = 4$  for the formula unit,  $C_{37}H_{32}Cl_7CoIrN_2OP_2$ . The final anisotropic full-matrix least-squares refinement on  $F^2$  with 471 variables converged at  $R1 = 5.94\%$ , for the observed data and  $wR2 = 15.36\%$  for all data. The goodness-of-fit was 1.090. The largest peak in the final difference electron density synthesis was 3.992 e/Å<sup>3</sup> and the largest hole was -1.083 e/Å<sup>3</sup> with an RMS deviation of 0.195 e/Å<sup>3</sup>. On the basis of the final model, the calculated density was 1.771 g/cm<sup>3</sup> and  $F(000)$ , 2116 e.

**Table S10.** Sample and crystal data for **3**.

|                        |                                                                                    |                 |
|------------------------|------------------------------------------------------------------------------------|-----------------|
| Identification code    | IrCo_1                                                                             |                 |
| Chemical formula       | C <sub>37</sub> H <sub>32</sub> Cl <sub>7</sub> CoIrN <sub>2</sub> OP <sub>2</sub> |                 |
| Formula weight         | 1081.86 g/mol                                                                      |                 |
| Temperature            | 100(2) K                                                                           |                 |
| Wavelength             | 0.71073 Å                                                                          |                 |
| Crystal size           | 0.390 x 0.494 x 0.497 mm                                                           |                 |
| Crystal habit          | green prism                                                                        |                 |
| Crystal system         | monoclinic                                                                         |                 |
| Space group            | C 1 c 1                                                                            |                 |
| Unit cell dimensions   | a = 21.731(7) Å                                                                    | α = 90°         |
|                        | b = 12.688(4) Å                                                                    | β = 108.649(4)° |
|                        | c = 15.533(5) Å                                                                    | γ = 90°         |
| Volume                 | 4058.(2) Å <sup>3</sup>                                                            |                 |
| Z                      | 4                                                                                  |                 |
| Density (calculated)   | 1.771 g/cm <sup>3</sup>                                                            |                 |
| Absorption coefficient | 4.258 mm <sup>-1</sup>                                                             |                 |
| F(000)                 | 2116                                                                               |                 |

**Table S11.** Data collection and structure refinement for **3**.

|                                     |                                                                                                                                                                        |                           |
|-------------------------------------|------------------------------------------------------------------------------------------------------------------------------------------------------------------------|---------------------------|
| Diffractometer                      | Bruker APEX II CCD                                                                                                                                                     |                           |
| Radiation source                    | fine-focus tube (MoKα, λ = 0.71073 Å)                                                                                                                                  |                           |
| Theta range for data collection     | 1.89 to 27.48°                                                                                                                                                         |                           |
| Index ranges                        | -28 ≤ h ≤ 28, -16 ≤ k ≤ 16, -20 ≤ l ≤ 20                                                                                                                               |                           |
| Reflections collected               | 30888                                                                                                                                                                  |                           |
| Independent reflections             | 9186 [R(int) = 0.0743]                                                                                                                                                 |                           |
| Coverage of independent reflections | 99.9%                                                                                                                                                                  |                           |
| Absorption correction               | Numerical Mu From Formula                                                                                                                                              |                           |
| Max. and min. transmission          | 0.0027 and 0.0001                                                                                                                                                      |                           |
| Structure solution technique        | direct methods                                                                                                                                                         |                           |
| Structure solution program          | SHELXTL XT 2014/5 (Bruker AXS, 2014)                                                                                                                                   |                           |
| Refinement method                   | Full-matrix least-squares on F <sup>2</sup>                                                                                                                            |                           |
| Refinement program                  | SHELXTL XL 2018/3 (Bruker AXS, 2018)                                                                                                                                   |                           |
| Function minimized                  | Σ w(F <sub>o</sub> <sup>2</sup> - F <sub>c</sub> <sup>2</sup> ) <sup>2</sup>                                                                                           |                           |
| Data / restraints / parameters      | 9186 / 421 / 471                                                                                                                                                       |                           |
| Goodness-of-fit on F <sup>2</sup>   | 1.090                                                                                                                                                                  |                           |
| Final R indices                     | 7574 data; I > 2σ(I)                                                                                                                                                   | R1 = 0.0594, wR2 = 0.1377 |
|                                     | all data                                                                                                                                                               | R1 = 0.0786, wR2 = 0.1536 |
| Weighting scheme                    | w = 1/[σ <sup>2</sup> (F <sub>o</sub> <sup>2</sup> ) + (0.0520P) <sup>2</sup> + 43.4173P]<br>where P = (F <sub>o</sub> <sup>2</sup> + 2F <sub>c</sub> <sup>2</sup> )/3 |                           |
| Absolute structure parameter        | 0.040(14)                                                                                                                                                              |                           |
| Largest diff. peak and hole         | 3.992 and -1.083 eÅ <sup>-3</sup>                                                                                                                                      |                           |
| R.M.S. deviation from mean          | 0.195 eÅ <sup>-3</sup>                                                                                                                                                 |                           |

**Table S12.** Atomic coordinates and equivalent isotropic atomic displacement parameters ( $\text{\AA}^2$ ) for **3**.

|      | x/a        | y/b        | z/c        | U(eq)      |
|------|------------|------------|------------|------------|
| C1   | 0.3712(9)  | 0.8609(15) | 0.5973(13) | 0.048(4)   |
| C2   | 0.3629(11) | 0.9282(16) | 0.6642(14) | 0.057(4)   |
| C3   | 0.4134(12) | 0.9840(17) | 0.7162(15) | 0.060(5)   |
| C4   | 0.4738(10) | 0.9760(15) | 0.6995(13) | 0.052(4)   |
| C5   | 0.4788(8)  | 0.9089(14) | 0.6325(10) | 0.042(3)   |
| C6   | 0.6209(8)  | 0.9400(12) | 0.6983(11) | 0.043(3)   |
| C7   | 0.6267(9)  | 0.0453(13) | 0.7275(12) | 0.051(4)   |
| C8   | 0.6782(9)  | 0.0751(15) | 0.8021(12) | 0.054(4)   |
| C9   | 0.7244(10) | 0.0012(14) | 0.8462(13) | 0.053(4)   |
| C10  | 0.7186(9)  | 0.8997(14) | 0.8184(12) | 0.050(4)   |
| C11  | 0.6679(7)  | 0.8679(14) | 0.7446(11) | 0.044(3)   |
| C12  | 0.5457(9)  | 0.0049(14) | 0.5217(14) | 0.051(4)   |
| C13  | 0.4862(10) | 0.0618(14) | 0.4810(13) | 0.050(4)   |
| C14  | 0.4851(11) | 0.1421(16) | 0.4198(14) | 0.061(4)   |
| C15  | 0.5394(12) | 0.1652(16) | 0.3952(13) | 0.061(4)   |
| C16  | 0.5957(13) | 0.1119(17) | 0.4342(15) | 0.066(5)   |
| C17  | 0.6001(10) | 0.0337(15) | 0.4964(14) | 0.052(4)   |
| C18  | 0.3834(10) | 0.6145(16) | 0.2950(12) | 0.052(4)   |
| C19  | 0.3838(10) | 0.5458(17) | 0.2250(13) | 0.056(5)   |
| C20  | 0.4344(10) | 0.4796(16) | 0.2330(12) | 0.051(4)   |
| C21  | 0.4859(10) | 0.4859(14) | 0.3126(12) | 0.050(4)   |
| C22  | 0.4847(8)  | 0.5529(13) | 0.3791(11) | 0.039(3)   |
| C23  | 0.5299(8)  | 0.4530(13) | 0.5526(11) | 0.047(4)   |
| C24  | 0.5757(10) | 0.4204(13) | 0.6328(11) | 0.050(4)   |
| C25  | 0.5611(10) | 0.3396(14) | 0.6843(13) | 0.056(4)   |
| C26  | 0.5008(9)  | 0.2917(15) | 0.6559(13) | 0.056(4)   |
| C27  | 0.4540(10) | 0.3271(14) | 0.5770(12) | 0.055(4)   |
| C28  | 0.4695(9)  | 0.4072(13) | 0.5260(12) | 0.051(4)   |
| C29  | 0.6199(9)  | 0.5136(12) | 0.4569(11) | 0.046(3)   |
| C30  | 0.6563(10) | 0.5858(16) | 0.4270(15) | 0.060(5)   |
| C31  | 0.7073(10) | 0.5529(17) | 0.3982(16) | 0.067(5)   |
| C32  | 0.7246(11) | 0.4483(17) | 0.4022(16) | 0.067(5)   |
| C33  | 0.6890(10) | 0.3751(18) | 0.4324(15) | 0.067(5)   |
| C34  | 0.6381(10) | 0.4085(14) | 0.4612(15) | 0.059(5)   |
| C35  | 0.5516(13) | 0.7780(16) | 0.4333(16) | 0.041(5)   |
| O1   | 0.5504(8)  | 0.8162(13) | 0.3655(12) | 0.042(4)   |
| C35A | 0.550(6)   | 0.701(6)   | 0.653(4)   | 0.041(5)   |
| O1A  | 0.548(4)   | 0.656(5)   | 0.718(3)   | 0.042(4)   |
| Cl1  | 0.5595(3)  | 0.6687(4)  | 0.6887(4)  | 0.0407(16) |
| Cl1A | 0.5589(15) | 0.799(2)   | 0.4008(17) | 0.0407(16) |
| Cl2  | 0.3728(2)  | 0.8532(4)  | 0.3677(3)  | 0.0520(10) |

|     | x/a         | y/b         | z/c         | U(eq)       |
|-----|-------------|-------------|-------------|-------------|
| Cl3 | 0.3597(2)   | 0.6206(4)   | 0.5177(3)   | 0.0464(9)   |
| Co1 | 0.42801(10) | 0.73405(17) | 0.47614(13) | 0.0352(4)   |
| Ir1 | 0.55656(3)  | 0.73075(4)  | 0.54388(3)  | 0.03729(16) |
| N1  | 0.4288(7)   | 0.8495(11)  | 0.5835(9)   | 0.042(3)    |
| N2  | 0.4343(7)   | 0.6201(12)  | 0.3717(10)  | 0.044(3)    |
| P1  | 0.5530(2)   | 0.8991(3)   | 0.5998(3)   | 0.0394(9)   |
| P2  | 0.5506(2)   | 0.5600(3)   | 0.4875(3)   | 0.0391(9)   |
| C36 | 0.2831(12)  | 0.334(2)    | 0.2040(18)  | 0.078(7)    |
| Cl4 | 0.3284(4)   | 0.2899(7)   | 0.3151(5)   | 0.093(2)    |
| Cl5 | 0.2205(3)   | 0.2431(6)   | 0.1524(6)   | 0.0845(19)  |
| C37 | 0.7798(12)  | 0.675(2)    | 0.6204(18)  | 0.073(6)    |
| Cl6 | 0.7248(3)   | 0.6191(5)   | 0.6671(4)   | 0.0747(15)  |
| Cl7 | 0.7542(4)   | 0.7927(6)   | 0.5628(5)   | 0.0870(19)  |

**Table S13.** Bond lengths (Å) for **3**.

|         |           |         |           |
|---------|-----------|---------|-----------|
| C1-N1   | 1.34(2)   | C1-C2   | 1.40(3)   |
| C1-H1   | 0.95      | C2-C3   | 1.34(3)   |
| C2-H2   | 0.95      | C3-C4   | 1.42(3)   |
| C3-H3   | 0.95      | C4-C5   | 1.38(2)   |
| C4-H4   | 0.95      | C5-N1   | 1.34(2)   |
| C5-P1   | 1.843(18) | C6-C11  | 1.388(19) |
| C6-C7   | 1.404(19) | C6-P1   | 1.829(16) |
| C7-C8   | 1.382(19) | C7-H7   | 0.95      |
| C8-C9   | 1.38(2)   | C8-H8   | 0.95      |
| C9-C10  | 1.35(2)   | C9-H9   | 0.95      |
| C10-C11 | 1.373(19) | C10-H10 | 0.95      |
| C11-H11 | 0.95      | C12-C17 | 1.41(3)   |
| C12-C13 | 1.44(2)   | C12-P1  | 1.782(19) |
| C13-C14 | 1.39(3)   | C13-H13 | 0.95      |
| C14-C15 | 1.38(3)   | C14-H14 | 0.95      |
| C15-C16 | 1.36(3)   | C15-H15 | 0.95      |
| C16-C17 | 1.37(3)   | C16-H16 | 0.95      |
| C17-H17 | 0.95      | C18-N2  | 1.34(2)   |
| C18-C19 | 1.40(3)   | C18-H18 | 0.95      |
| C19-C20 | 1.36(3)   | C19-H19 | 0.95      |
| C20-C21 | 1.38(3)   | C20-H20 | 0.95      |
| C21-C22 | 1.34(2)   | C21-H21 | 0.95      |
| C22-N2  | 1.37(2)   | C22-P2  | 1.830(17) |
| C23-C28 | 1.37(2)   | C23-C24 | 1.386(19) |
| C23-P2  | 1.833(17) | C24-C25 | 1.40(2)   |
| C24-H24 | 0.95      | C25-C26 | 1.38(2)   |
| C25-H25 | 0.95      | C26-C27 | 1.39(2)   |
| C26-H26 | 0.95      | C27-C28 | 1.394(19) |
| C27-H27 | 0.95      | C28-H28 | 0.95      |



|          |           |          |           |
|----------|-----------|----------|-----------|
| C29-C30  | 1.39(2)   | C29-C34  | 1.387(19) |
| C29-P2   | 1.816(18) | C30-C31  | 1.39(2)   |
| C30-H30  | 0.95      | C31-C32  | 1.38(2)   |
| C31-H31  | 0.95      | C32-C33  | 1.38(2)   |
| C32-H32  | 0.95      | C33-C34  | 1.38(2)   |
| C33-H33  | 0.95      | C34-H34  | 0.95      |
| C35-O1   | 1.15(3)   | C35-Ir1  | 1.79(3)   |
| C35A-O1A | 1.17(4)   | C35A-Ir1 | 1.79(4)   |
| Cl1-Ir1  | 2.365(5)  | Cl1A-Ir1 | 2.40(2)   |
| Cl2-Co1  | 2.296(5)  | Cl3-Co1  | 2.304(5)  |
| Co1-N2   | 2.209(15) | Co1-N1   | 2.215(14) |
| Co1-Ir1  | 2.652(2)  | Ir1-P1   | 2.316(4)  |
| Ir1-P2   | 2.324(4)  | C36-Cl5  | 1.77(2)   |
| C36-Cl4  | 1.78(3)   | C36-H36A | 0.99      |
| C36-H36B | 0.99      | C37-Cl7  | 1.73(3)   |
| C37-Cl6  | 1.74(3)   | C37-H37A | 0.99      |
| C37-H37B | 0.99      |          |           |

**Table S14.** Bond angles (°) for **3**.

|             |           |             |           |
|-------------|-----------|-------------|-----------|
| N1-C1-C2    | 122.1(18) | N1-C1-H1    | 118.9     |
| C2-C1-H1    | 118.9     | C3-C2-C1    | 119.7(19) |
| C3-C2-H2    | 120.1     | C1-C2-H2    | 120.1     |
| C2-C3-C4    | 118.6(18) | C2-C3-H3    | 120.7     |
| C4-C3-H3    | 120.7     | C5-C4-C3    | 118.9(18) |
| C5-C4-H4    | 120.5     | C3-C4-H4    | 120.5     |
| N1-C5-C4    | 122.1(17) | N1-C5-P1    | 115.2(12) |
| C4-C5-P1    | 122.6(15) | C11-C6-C7   | 119.0(15) |
| C11-C6-P1   | 120.6(12) | C7-C6-P1    | 120.3(12) |
| C8-C7-C6    | 119.7(17) | C8-C7-H7    | 120.2     |
| C6-C7-H7    | 120.2     | C7-C8-C9    | 119.7(17) |
| C7-C8-H8    | 120.2     | C9-C8-H8    | 120.2     |
| C10-C9-C8   | 120.6(18) | C10-C9-H9   | 119.7     |
| C8-C9-H9    | 119.7     | C9-C10-C11  | 121.0(18) |
| C9-C10-H10  | 119.5     | C11-C10-H10 | 119.5     |
| C10-C11-C6  | 120.0(16) | C10-C11-H11 | 120.0     |
| C6-C11-H11  | 120.0     | C17-C12-C13 | 117.7(18) |
| C17-C12-P1  | 119.1(14) | C13-C12-P1  | 123.2(15) |
| C14-C13-C12 | 119.(2)   | C14-C13-H13 | 120.5     |
| C12-C13-H13 | 120.5     | C15-C14-C13 | 121.(2)   |
| C15-C14-H14 | 119.5     | C13-C14-H14 | 119.5     |
| C16-C15-C14 | 120.(2)   | C16-C15-H15 | 120.0     |
| C14-C15-H15 | 120.0     | C15-C16-C17 | 122.(2)   |
| C15-C16-H16 | 119.2     | C17-C16-H16 | 119.2     |
| C16-C17-C12 | 121.(2)   | C16-C17-H17 | 119.6     |
| C12-C17-H17 | 119.6     | N2-C18-C19  | 121.1(18) |

|               |            |              |            |
|---------------|------------|--------------|------------|
| N2-C18-H18    | 119.4      | C19-C18-H18  | 119.4      |
| C20-C19-C18   | 121.4(18)  | C20-C19-H19  | 119.3      |
| C18-C19-H19   | 119.3      | C19-C20-C21  | 116.6(18)  |
| C19-C20-H20   | 121.7      | C21-C20-H20  | 121.7      |
| C22-C21-C20   | 121.0(18)  | C22-C21-H21  | 119.5      |
| C20-C21-H21   | 119.5      | C21-C22-N2   | 122.8(16)  |
| C21-C22-P2    | 122.5(14)  | N2-C22-P2    | 114.7(12)  |
| C28-C23-C24   | 119.2(16)  | C28-C23-P2   | 121.8(12)  |
| C24-C23-P2    | 118.9(13)  | C23-C24-C25  | 120.2(18)  |
| C23-C24-H24   | 119.9      | C25-C24-H24  | 119.9      |
| C26-C25-C24   | 120.4(18)  | C26-C25-H25  | 119.8      |
| C24-C25-H25   | 119.8      | C25-C26-C27  | 119.3(18)  |
| C25-C26-H26   | 120.3      | C27-C26-H26  | 120.3      |
| C26-C27-C28   | 119.6(19)  | C26-C27-H27  | 120.2      |
| C28-C27-H27   | 120.2      | C23-C28-C27  | 121.3(17)  |
| C23-C28-H28   | 119.3      | C27-C28-H28  | 119.3      |
| C30-C29-C34   | 117.8(17)  | C30-C29-P2   | 118.9(13)  |
| C34-C29-P2    | 123.2(14)  | C29-C30-C31  | 120.7(19)  |
| C29-C30-H30   | 119.6      | C31-C30-H30  | 119.6      |
| C32-C31-C30   | 121.(2)    | C32-C31-H31  | 119.7      |
| C30-C31-H31   | 119.7      | C31-C32-C33  | 119.(2)    |
| C31-C32-H32   | 120.3      | C33-C32-H32  | 120.3      |
| C32-C33-C34   | 120.(2)    | C32-C33-H33  | 120.2      |
| C34-C33-H33   | 120.2      | C33-C34-C29  | 122.(2)    |
| C33-C34-H34   | 119.2      | C29-C34-H34  | 119.2      |
| O1-C35-Ir1    | 174.3(18)  | O1A-C35A-Ir1 | 162.(7)    |
| N2-Co1-N1     | 176.2(5)   | N2-Co1-Cl2   | 91.9(4)    |
| N1-Co1-Cl2    | 89.6(4)    | N2-Co1-Cl3   | 89.6(4)    |
| N1-Co1-Cl3    | 93.0(4)    | Cl2-Co1-Cl3  | 112.63(19) |
| N2-Co1-Ir1    | 88.7(4)    | N1-Co1-Ir1   | 87.6(4)    |
| Cl2-Co1-Ir1   | 122.58(16) | Cl3-Co1-Ir1  | 124.79(14) |
| C35A-Ir1-P1   | 79.(3)     | C35-Ir1-P1   | 93.0(6)    |
| C35A-Ir1-P2   | 99.(3)     | C35-Ir1-P2   | 88.4(6)    |
| P1-Ir1-P2     | 174.86(18) | C35-Ir1-Cl1  | 178.2(9)   |
| P1-Ir1-Cl1    | 86.80(17)  | P2-Ir1-Cl1   | 91.67(16)  |
| C35A-Ir1-Cl1A | 170.(3)    | P1-Ir1-Cl1A  | 91.5(6)    |
| P2-Ir1-Cl1A   | 90.3(6)    | C35A-Ir1-Co1 | 89.(4)     |
| C35-Ir1-Co1   | 83.2(8)    | P1-Ir1-Co1   | 88.67(13)  |
| P2-Ir1-Co1    | 86.58(13)  | Cl1-Ir1-Co1  | 94.99(15)  |
| Cl1A-Ir1-Co1  | 87.6(7)    | C5-N1-C1     | 118.4(15)  |
| C5-N1-Co1     | 127.5(11)  | C1-N1-Co1    | 114.1(12)  |
| C18-N2-C22    | 116.9(15)  | C18-N2-Co1   | 117.4(13)  |
| C22-N2-Co1    | 125.7(11)  | C12-P1-C6    | 103.1(8)   |
| C12-P1-C5     | 104.0(9)   | C6-P1-C5     | 107.1(8)   |
| C12-P1-Ir1    | 116.4(7)   | C6-P1-Ir1    | 117.4(5)   |

|               |          |              |           |
|---------------|----------|--------------|-----------|
| C5-P1-Ir1     | 107.6(6) | C29-P2-C22   | 102.3(8)  |
| C29-P2-C23    | 105.9(8) | C22-P2-C23   | 102.3(7)  |
| C29-P2-Ir1    | 116.7(6) | C22-P2-Ir1   | 109.0(6)  |
| C23-P2-Ir1    | 118.5(6) | Cl5-C36-Cl4  | 109.8(15) |
| Cl5-C36-H36A  | 109.7    | Cl4-C36-H36A | 109.7     |
| Cl5-C36-H36B  | 109.7    | Cl4-C36-H36B | 109.7     |
| H36A-C36-H36B | 108.2    | Cl7-C37-Cl6  | 114.7(14) |
| Cl7-C37-H37A  | 108.6    | Cl6-C37-H37A | 108.6     |
| Cl7-C37-H37B  | 108.6    | Cl6-C37-H37B | 108.6     |
| H37A-C37-H37B | 107.6    |              |           |

**Table S15.** Bond lengths (Å) for **3**.

|         |           |         |           |
|---------|-----------|---------|-----------|
| C1-N1   | 1.34(2)   | C1-C2   | 1.40(3)   |
| C1-H1   | 0.95      | C2-C3   | 1.34(3)   |
| C2-H2   | 0.95      | C3-C4   | 1.42(3)   |
| C3-H3   | 0.95      | C4-C5   | 1.38(2)   |
| C4-H4   | 0.95      | C5-N1   | 1.34(2)   |
| C5-P1   | 1.843(18) | C6-C11  | 1.388(19) |
| C6-C7   | 1.404(19) | C6-P1   | 1.829(16) |
| C7-C8   | 1.382(19) | C7-H7   | 0.95      |
| C8-C9   | 1.38(2)   | C8-H8   | 0.95      |
| C9-C10  | 1.35(2)   | C9-H9   | 0.95      |
| C10-C11 | 1.373(19) | C10-H10 | 0.95      |
| C11-H11 | 0.95      | C12-C17 | 1.41(3)   |
| C12-C13 | 1.44(2)   | C12-P1  | 1.782(19) |
| C13-C14 | 1.39(3)   | C13-H13 | 0.95      |
| C14-C15 | 1.38(3)   | C14-H14 | 0.95      |
| C15-C16 | 1.36(3)   | C15-H15 | 0.95      |
| C16-C17 | 1.37(3)   | C16-H16 | 0.95      |
| C17-H17 | 0.95      | C18-N2  | 1.34(2)   |
| C18-C19 | 1.40(3)   | C18-H18 | 0.95      |
| C19-C20 | 1.36(3)   | C19-H19 | 0.95      |
| C20-C21 | 1.38(3)   | C20-H20 | 0.95      |
| C21-C22 | 1.34(2)   | C21-H21 | 0.95      |
| C22-N2  | 1.37(2)   | C22-P2  | 1.830(17) |
| C23-C28 | 1.37(2)   | C23-C24 | 1.386(19) |
| C23-P2  | 1.833(17) | C24-C25 | 1.40(2)   |
| C24-H24 | 0.95      | C25-C26 | 1.38(2)   |
| C25-H25 | 0.95      | C26-C27 | 1.39(2)   |
| C26-H26 | 0.95      | C27-C28 | 1.394(19) |
| C27-H27 | 0.95      | C28-H28 | 0.95      |
| C29-C30 | 1.39(2)   | C29-C34 | 1.387(19) |
| C29-P2  | 1.816(18) | C30-C31 | 1.39(2)   |
| C30-H30 | 0.95      | C31-C32 | 1.38(2)   |
| C31-H31 | 0.95      | C32-C33 | 1.38(2)   |

|          |           |          |           |
|----------|-----------|----------|-----------|
| C32-H32  | 0.95      | C33-C34  | 1.38(2)   |
| C33-H33  | 0.95      | C34-H34  | 0.95      |
| C35-O1   | 1.15(3)   | C35-Ir1  | 1.79(3)   |
| C35A-O1A | 1.17(4)   | C35A-Ir1 | 1.79(4)   |
| Cl1-Ir1  | 2.365(5)  | Cl1A-Ir1 | 2.40(2)   |
| Cl2-Co1  | 2.296(5)  | Cl3-Co1  | 2.304(5)  |
| Co1-N2   | 2.209(15) | Co1-N1   | 2.215(14) |
| Co1-Ir1  | 2.652(2)  | Ir1-P1   | 2.316(4)  |
| Ir1-P2   | 2.324(4)  | C36-Cl5  | 1.77(2)   |
| C36-Cl4  | 1.78(3)   | C36-H36A | 0.99      |
| C36-H36B | 0.99      | C37-Cl7  | 1.73(3)   |
| C37-Cl6  | 1.74(3)   | C37-H37A | 0.99      |
| C37-H37B | 0.99      |          |           |

**Table S16.** Anisotropic atomic displacement parameters ( $\text{\AA}^2$ ) for **3**.

The anisotropic atomic displacement factor exponent takes the form:  $-2\pi^2[h^2a^*U_{11} + \dots + 2hka^*b^*U_{12}]$

|     | $U_{11}$  | $U_{22}$  | $U_{33}$  | $U_{23}$  | $U_{13}$  | $U_{12}$  |
|-----|-----------|-----------|-----------|-----------|-----------|-----------|
| C1  | 0.043(8)  | 0.058(10) | 0.049(9)  | -0.003(7) | 0.021(7)  | 0.003(7)  |
| C2  | 0.061(10) | 0.060(11) | 0.059(11) | 0.002(8)  | 0.031(8)  | 0.015(8)  |
| C3  | 0.077(11) | 0.063(12) | 0.049(11) | -0.012(8) | 0.030(9)  | 0.012(8)  |
| C4  | 0.059(9)  | 0.056(10) | 0.039(9)  | -0.006(7) | 0.014(8)  | 0.007(8)  |
| C5  | 0.045(7)  | 0.053(9)  | 0.024(7)  | -0.001(6) | 0.007(6)  | 0.009(6)  |
| C6  | 0.044(8)  | 0.046(8)  | 0.038(8)  | -0.009(6) | 0.011(6)  | -0.004(6) |
| C7  | 0.054(9)  | 0.046(8)  | 0.048(9)  | -0.010(7) | 0.010(7)  | -0.001(7) |
| C8  | 0.058(10) | 0.052(9)  | 0.047(9)  | -0.009(7) | 0.010(7)  | -0.008(7) |
| C9  | 0.055(10) | 0.064(9)  | 0.041(9)  | -0.009(7) | 0.017(7)  | -0.003(7) |
| C10 | 0.051(9)  | 0.061(8)  | 0.042(8)  | -0.001(7) | 0.019(7)  | 0.000(7)  |
| C11 | 0.038(8)  | 0.050(8)  | 0.043(8)  | 0.000(6)  | 0.012(6)  | -0.004(6) |
| C12 | 0.041(9)  | 0.042(8)  | 0.069(13) | 0.005(7)  | 0.016(8)  | 0.001(6)  |
| C13 | 0.050(9)  | 0.049(9)  | 0.049(10) | 0.003(7)  | 0.010(8)  | 0.008(7)  |
| C14 | 0.076(11) | 0.053(10) | 0.045(10) | 0.005(7)  | 0.006(9)  | 0.001(9)  |
| C15 | 0.097(12) | 0.047(10) | 0.041(10) | -0.002(7) | 0.024(9)  | -0.010(8) |
| C16 | 0.090(12) | 0.057(11) | 0.060(12) | 0.002(8)  | 0.037(11) | -0.007(9) |
| C17 | 0.058(9)  | 0.050(9)  | 0.056(11) | -0.003(7) | 0.029(9)  | -0.004(7) |
| C18 | 0.053(9)  | 0.067(11) | 0.035(8)  | 0.008(7)  | 0.012(6)  | 0.004(8)  |
| C19 | 0.054(10) | 0.070(12) | 0.035(9)  | 0.001(7)  | 0.001(8)  | -0.004(8) |
| C20 | 0.058(10) | 0.062(11) | 0.031(7)  | -0.002(7) | 0.012(7)  | -0.005(7) |
| C21 | 0.060(10) | 0.047(9)  | 0.036(8)  | -0.004(6) | 0.007(7)  | 0.003(8)  |
| C22 | 0.043(7)  | 0.040(8)  | 0.035(7)  | 0.000(5)  | 0.013(6)  | -0.008(6) |
| C23 | 0.065(9)  | 0.036(8)  | 0.044(8)  | 0.005(6)  | 0.022(7)  | 0.008(6)  |
| C24 | 0.065(10) | 0.043(9)  | 0.041(8)  | 0.002(7)  | 0.017(7)  | 0.005(7)  |
| C25 | 0.071(10) | 0.052(10) | 0.047(10) | 0.012(7)  | 0.021(8)  | 0.013(8)  |
| C26 | 0.076(10) | 0.049(10) | 0.050(9)  | 0.006(7)  | 0.029(8)  | 0.006(8)  |
| C27 | 0.075(11) | 0.046(9)  | 0.044(9)  | -0.001(7) | 0.019(8)  | -0.004(8) |

|      | $U_{11}$   | $U_{22}$   | $U_{33}$   | $U_{23}$    | $U_{13}$   | $U_{12}$    |
|------|------------|------------|------------|-------------|------------|-------------|
| C28  | 0.065(9)   | 0.044(9)   | 0.043(9)   | 0.003(7)    | 0.017(7)   | 0.002(7)    |
| C29  | 0.053(9)   | 0.049(8)   | 0.034(8)   | -0.006(6)   | 0.012(7)   | 0.008(7)    |
| C30  | 0.073(12)  | 0.059(10)  | 0.057(12)  | 0.000(9)    | 0.031(10)  | 0.004(8)    |
| C31  | 0.061(12)  | 0.082(11)  | 0.060(13)  | -0.001(11)  | 0.023(10)  | 0.004(10)   |
| C32  | 0.057(12)  | 0.088(12)  | 0.054(13)  | -0.003(11)  | 0.014(10)  | 0.018(9)    |
| C33  | 0.066(12)  | 0.070(11)  | 0.064(13)  | -0.008(10)  | 0.021(10)  | 0.021(9)    |
| C34  | 0.064(11)  | 0.051(8)   | 0.062(12)  | -0.012(8)   | 0.021(9)   | 0.009(8)    |
| C35  | 0.075(15)  | 0.026(9)   | 0.030(9)   | -0.006(6)   | 0.025(8)   | -0.002(8)   |
| O1   | 0.063(10)  | 0.043(8)   | 0.025(8)   | 0.002(6)    | 0.020(7)   | -0.004(7)   |
| C35A | 0.075(15)  | 0.026(9)   | 0.030(9)   | -0.006(6)   | 0.025(8)   | -0.002(8)   |
| O1A  | 0.063(10)  | 0.043(8)   | 0.025(8)   | 0.002(6)    | 0.020(7)   | -0.004(7)   |
| Cl1  | 0.059(3)   | 0.037(3)   | 0.028(3)   | 0.000(2)    | 0.016(2)   | 0.000(2)    |
| Cl1A | 0.059(3)   | 0.037(3)   | 0.028(3)   | 0.000(2)    | 0.016(2)   | 0.000(2)    |
| Cl2  | 0.064(3)   | 0.057(2)   | 0.039(2)   | 0.0147(18)  | 0.022(2)   | 0.011(2)    |
| Cl3  | 0.051(2)   | 0.055(2)   | 0.0339(19) | 0.0070(17)  | 0.0147(17) | -0.0049(19) |
| Co1  | 0.0362(11) | 0.0437(11) | 0.0263(10) | 0.0041(9)   | 0.0106(8)  | 0.0022(10)  |
| Ir1  | 0.0453(3)  | 0.0362(3)  | 0.0308(3)  | -0.0019(4)  | 0.0127(2)  | 0.0003(4)   |
| N1   | 0.040(6)   | 0.050(7)   | 0.036(7)   | 0.002(5)    | 0.015(5)   | 0.000(5)    |
| N2   | 0.050(7)   | 0.049(8)   | 0.035(6)   | 0.000(6)    | 0.017(5)   | -0.004(6)   |
| P1   | 0.049(2)   | 0.034(2)   | 0.036(2)   | -0.0024(16) | 0.0148(19) | 0.0024(17)  |
| P2   | 0.050(2)   | 0.035(2)   | 0.029(2)   | -0.0054(15) | 0.0092(17) | 0.0000(17)  |
| C36  | 0.059(13)  | 0.100(18)  | 0.082(17)  | -0.016(14)  | 0.033(12)  | -0.018(12)  |
| Cl4  | 0.077(4)   | 0.108(6)   | 0.084(5)   | -0.015(4)   | 0.013(3)   | 0.014(4)    |
| Cl5  | 0.069(4)   | 0.091(4)   | 0.092(5)   | -0.027(4)   | 0.022(3)   | -0.012(3)   |
| C37  | 0.076(15)  | 0.078(15)  | 0.071(15)  | -0.014(12)  | 0.029(12)  | 0.004(12)   |
| Cl6  | 0.082(4)   | 0.080(4)   | 0.065(3)   | -0.011(3)   | 0.026(3)   | -0.002(3)   |
| Cl7  | 0.088(4)   | 0.080(4)   | 0.080(4)   | -0.001(3)   | 0.008(4)   | -0.008(3)   |

**Table S17.** Hydrogen atomic coordinates and isotropic atomic displacement parameters ( $\text{\AA}^2$ ) for **3**.

|     | $x/a$  | $y/b$  | $z/c$  | $U(\text{eq})$ |
|-----|--------|--------|--------|----------------|
| H1  | 0.3349 | 0.8221 | 0.5605 | 0.058          |
| H2  | 0.3216 | 0.9342 | 0.6726 | 0.069          |
| H3  | 0.4089 | 1.0281 | 0.7633 | 0.073          |
| H4  | 0.5102 | 1.0163 | 0.7340 | 0.062          |
| H7  | 0.5953 | 1.0960 | 0.6960 | 0.061          |
| H8  | 0.6819 | 1.1459 | 0.8231 | 0.065          |
| H9  | 0.7605 | 1.0221 | 0.8965 | 0.064          |
| H10 | 0.7502 | 0.8497 | 0.8504 | 0.06           |
| H11 | 0.6649 | 0.7965 | 0.7253 | 0.053          |
| H13 | 0.4483 | 1.0446 | 0.4959 | 0.061          |
| H14 | 0.4464 | 1.1818 | 0.3945 | 0.073          |
| H15 | 0.5373 | 1.2181 | 0.3512 | 0.073          |
| H16 | 0.6330 | 1.1295 | 0.4177 | 0.079          |

|      | <b>x/a</b> | <b>y/b</b> | <b>z/c</b> | <b>U(eq)</b> |
|------|------------|------------|------------|--------------|
| H17  | 0.6403     | 0.9984     | 0.5229     | 0.062        |
| H18  | 0.3466     | 0.6580     | 0.2882     | 0.063        |
| H19  | 0.3478     | 0.5453     | 0.1706     | 0.067        |
| H20  | 0.4343     | 0.4315     | 0.1862     | 0.062        |
| H21  | 0.5227     | 0.4420     | 0.3206     | 0.06         |
| H24  | 0.6172     | 0.4531     | 0.6529     | 0.06         |
| H25  | 0.5927     | 0.3174     | 0.7390     | 0.067        |
| H26  | 0.4913     | 0.2353     | 0.6898     | 0.068        |
| H27  | 0.4118     | 0.2968     | 0.5580     | 0.067        |
| H28  | 0.4377     | 0.4305     | 0.4719     | 0.061        |
| H30  | 0.6463     | 0.6588     | 0.4263     | 0.073        |
| H31  | 0.7306     | 0.6032     | 0.3753     | 0.08         |
| H32  | 0.7606     | 0.4265     | 0.3845     | 0.08         |
| H33  | 0.6994     | 0.3022     | 0.4334     | 0.08         |
| H34  | 0.6151     | 0.3581     | 0.4844     | 0.071        |
| H36A | 0.2640     | 0.4043     | 0.2078     | 0.093        |
| H36B | 0.3122     | 0.3414     | 0.1666     | 0.093        |
| H37A | 0.8211     | 0.6883     | 0.6698     | 0.088        |
| H37B | 0.7889     | 0.6241     | 0.5779     | 0.088        |

### Crystal Structure of 4

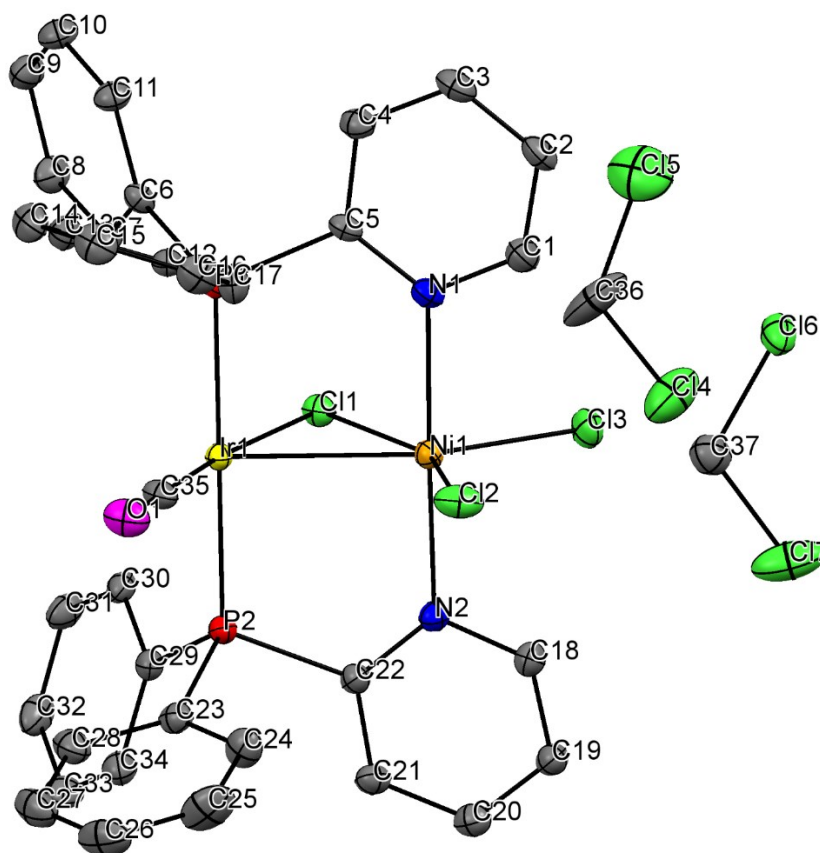

**Figure S17.** Molecular structure of **4** shown with 50% probability ellipsoids.

A red needle-like specimen of  $C_{37}H_{32}Cl_7IrN_2NiOP_2$ , approximate dimensions 0.105 mm x 0.137 mm x 0.289 mm, was used for the X-ray crystallographic analysis. The X-ray intensity data were measured on a Bruker APEX II CCD Bruker APEX DUO system equipped with a fine-focus tube ( $MoK\alpha$ ,  $\lambda = 0.71073$  Å) and a TRIUMPH curved-crystal monochromator.

The frames were integrated with the Bruker SAINT software package using a SAINT V8.40A (Bruker AXS, 2013) algorithm. The integration of the data using a monoclinic unit cell yielded a total of 95672 reflections to a maximum  $\theta$  angle of  $29.57^\circ$  ( $0.72$  Å resolution), of which 11264 were independent (average redundancy 8.494, completeness = 99.9%,  $R_{int} = 6.42\%$ ,  $R_{sig} = 3.55\%$ ) and 9735 (86.43%) were greater than  $2\sigma(F^2)$ . The final cell constants of  $a = 9.717(4)$  Å,  $b = 16.846(6)$  Å,  $c = 24.683(9)$  Å,  $\beta = 99.673(6)^\circ$ , volume =  $3983.2(2)$  Å<sup>3</sup>, are based upon the refinement of the XYZ-centroids of 9679 reflections above  $20\sigma(I)$  with  $4.824^\circ < 2\theta < 60.58^\circ$ . Data were corrected for absorption effects using the multi-scan method (SADABS). The calculated minimum and maximum transmission coefficients (based on crystal size) are 0.0590 and 0.0998.

The structure was solved and refined using the Bruker SHELXTL Software Package, using the space group P 1 21/n 1, with  $Z = 4$  for the formula unit,  $C_{37}H_{32}Cl_7IrN_2NiOP_2$ . The final anisotropic full-matrix least-squares refinement on  $F^2$  with 481 variables converged at  $R1 = 3.88\%$ , for the observed data and  $wR2 = 9.03\%$  for all data. The goodness-of-fit was 1.121. The largest peak in the final difference electron density synthesis was  $2.366 e/\text{Å}^3$  and the largest hole was  $-1.278 e/\text{Å}^3$  with an RMS deviation of  $0.159 e/\text{Å}^3$ . On the basis of the final model, the calculated density was  $1.804 g/cm^3$  and  $F(000)$ , 2120 e.

**Table S18.** Sample and crystal data for **4**.

|                        |                               |                           |
|------------------------|-------------------------------|---------------------------|
| Identification code    | Val                           |                           |
| Chemical formula       | $C_{37}H_{32}Cl_7IrN_2NiOP_2$ |                           |
| Formula weight         | 1081.64 g/mol                 |                           |
| Temperature            | 100(2) K                      |                           |
| Wavelength             | 0.71073 Å                     |                           |
| Crystal size           | 0.105 x 0.137 x 0.289 mm      |                           |
| Crystal habit          | red needle                    |                           |
| Crystal system         | monoclinic                    |                           |
| Space group            | P 1 21/n 1                    |                           |
| Unit cell dimensions   | a = 9.717(4) Å                | $\alpha = 90^\circ$       |
|                        | b = 16.846(6) Å               | $\beta = 99.673(6)^\circ$ |
|                        | c = 24.683(9) Å               | $\gamma = 90^\circ$       |
| Volume                 | 3983.(2) Å <sup>3</sup>       |                           |
| Z                      | 4                             |                           |
| Density (calculated)   | 1.804 g/cm <sup>3</sup>       |                           |
| Absorption coefficient | 4.394 mm <sup>-1</sup>        |                           |
| F(000)                 | 2120                          |                           |

**Table S19.** Data collection and structure refinement for **4**.

|                                     |                                                                                                                     |                           |
|-------------------------------------|---------------------------------------------------------------------------------------------------------------------|---------------------------|
| Diffractometer                      | Bruker APEX II CCD Bruker APEX DUO                                                                                  |                           |
| Radiation source                    | fine-focus tube (MoK $\alpha$ , $\lambda = 0.71073$ Å)                                                              |                           |
| Theta range for data collection     | 2.15 to 29.57°                                                                                                      |                           |
| Index ranges                        | -13 ≤ h ≤ 13, -23 ≤ k ≤ 23, -34 ≤ l ≤ 34                                                                            |                           |
| Reflections collected               | 95672                                                                                                               |                           |
| Independent reflections             | 11264 [R(int) = 0.0642]                                                                                             |                           |
| Coverage of independent reflections | 99.9%                                                                                                               |                           |
| Absorption correction               | multi-scan                                                                                                          |                           |
| Max. and min. transmission          | 0.0998 and 0.0590                                                                                                   |                           |
| Structure solution technique        | direct methods                                                                                                      |                           |
| Structure solution program          | SHELXTL XT 2014/5 (Bruker AXS, 2014)                                                                                |                           |
| Refinement method                   | Full-matrix least-squares on F <sup>2</sup>                                                                         |                           |
| Refinement program                  | SHELXL-2018/3 (Sheldrick, 2018)                                                                                     |                           |
| Function minimized                  | $\Sigma w(F_o^2 - F_c^2)^2$                                                                                         |                           |
| Data / restraints / parameters      | 11264 / 18 / 481                                                                                                    |                           |
| Goodness-of-fit on F <sup>2</sup>   | 1.121                                                                                                               |                           |
| $\Delta/\sigma_{\max}$              | 0.002                                                                                                               |                           |
| Final R indices                     | 9735 data; I > 2 $\sigma$ (I)                                                                                       | R1 = 0.0388, wR2 = 0.0851 |
|                                     | all data                                                                                                            | R1 = 0.0500, wR2 = 0.0903 |
| Weighting scheme                    | w = 1/[ $\sigma^2(F_o^2) + 36.4461P$ ]<br>where P = (F <sub>o</sub> <sup>2</sup> + 2F <sub>c</sub> <sup>2</sup> )/3 |                           |
| Largest diff. peak and hole         | 2.366 and -1.278 eÅ <sup>-3</sup>                                                                                   |                           |
| R.M.S. deviation from mean          | 0.159 eÅ <sup>-3</sup>                                                                                              |                           |



**Table S20.** Atomic coordinates and equivalent isotropic atomic displacement parameters ( $\text{\AA}^2$ ) for **4**. U(eq) is defined as one third of the trace of the orthogonalized  $U_{ij}$  tensor.

|     | x/a         | y/b        | z/c         | U(eq)       |
|-----|-------------|------------|-------------|-------------|
| C1  | 0.5257(6)   | 0.4939(3)  | 0.2515(2)   | 0.0219(11)  |
| C2  | 0.4998(6)   | 0.4137(3)  | 0.2400(2)   | 0.0228(11)  |
| C3  | 0.5900(6)   | 0.3578(3)  | 0.2668(2)   | 0.0225(10)  |
| C4  | 0.7004(6)   | 0.3836(3)  | 0.3062(2)   | 0.0197(10)  |
| C5  | 0.7177(5)   | 0.4649(3)  | 0.3172(2)   | 0.0146(9)   |
| C6  | 0.0113(5)   | 0.4518(3)  | 0.3712(2)   | 0.0158(9)   |
| C7  | 0.1209(5)   | 0.5000(3)  | 0.3613(2)   | 0.0187(10)  |
| C8  | 0.2496(6)   | 0.4676(3)  | 0.3564(2)   | 0.0229(11)  |
| C9  | 0.2687(6)   | 0.3852(3)  | 0.3610(2)   | 0.0230(11)  |
| C10 | 0.1606(6)   | 0.3370(3)  | 0.3704(2)   | 0.0216(11)  |
| C11 | 0.0332(5)   | 0.3695(3)  | 0.3764(2)   | 0.0193(10)  |
| C12 | 0.7780(5)   | 0.4485(3)  | 0.4314(2)   | 0.0146(9)   |
| C13 | 0.8665(6)   | 0.4147(3)  | 0.4760(2)   | 0.0198(10)  |
| C14 | 0.8111(6)   | 0.3807(3)  | 0.5187(2)   | 0.0243(11)  |
| C15 | 0.6674(6)   | 0.3808(3)  | 0.5185(2)   | 0.0264(12)  |
| C16 | 0.5796(6)   | 0.4146(4)  | 0.4746(2)   | 0.0257(12)  |
| C17 | 0.6345(6)   | 0.4486(3)  | 0.4312(2)   | 0.0208(11)  |
| C18 | 0.5360(5)   | 0.8118(3)  | 0.2726(2)   | 0.0186(10)  |
| C19 | 0.5235(6)   | 0.8935(3)  | 0.2678(2)   | 0.0197(10)  |
| C20 | 0.6250(6)   | 0.9410(3)  | 0.2978(2)   | 0.0214(11)  |
| C21 | 0.7324(6)   | 0.9049(3)  | 0.3331(2)   | 0.0194(10)  |
| C22 | 0.7370(5)   | 0.8223(3)  | 0.3371(2)   | 0.0164(9)   |
| C23 | 0.7966(6)   | 0.8088(3)  | 0.4528(2)   | 0.0185(10)  |
| C24 | 0.6531(6)   | 0.8161(4)  | 0.4517(2)   | 0.0252(12)  |
| C25 | 0.6029(8)   | 0.8370(4)  | 0.4989(3)   | 0.0386(16)  |
| C26 | 0.6948(8)   | 0.8505(4)  | 0.5472(2)   | 0.0350(15)  |
| C27 | 0.8370(8)   | 0.8424(4)  | 0.5491(2)   | 0.0311(13)  |
| C28 | 0.8883(7)   | 0.8206(3)  | 0.5017(2)   | 0.0246(11)  |
| C29 | 0.0282(5)   | 0.8206(3)  | 0.3929(2)   | 0.0158(9)   |
| C30 | 0.1348(5)   | 0.7796(3)  | 0.3733(2)   | 0.0178(10)  |
| C31 | 0.2652(6)   | 0.8143(3)  | 0.3739(2)   | 0.0235(11)  |
| C32 | 0.2893(6)   | 0.8914(3)  | 0.3947(3)   | 0.0259(12)  |
| C33 | 0.1854(6)   | 0.9326(3)  | 0.4141(2)   | 0.0252(12)  |
| C34 | 0.0559(6)   | 0.8980(3)  | 0.4137(2)   | 0.0219(11)  |
| C35 | 0.7909(5)   | 0.6288(3)  | 0.4496(2)   | 0.0181(9)   |
| Cl1 | 0.89786(13) | 0.64550(7) | 0.29172(5)  | 0.0176(2)   |
| Cl2 | 0.45083(15) | 0.64323(8) | 0.34113(6)  | 0.0256(3)   |
| Cl3 | 0.57209(15) | 0.66191(8) | 0.20164(5)  | 0.0243(3)   |
| Ir1 | 0.85265(2)  | 0.63583(2) | 0.38346(2)  | 0.01277(5)  |
| N1  | 0.6332(4)   | 0.5203(3)  | 0.28891(18) | 0.0172(8)   |
| N2  | 0.6421(4)   | 0.7750(3)  | 0.30523(18) | 0.0157(8)   |
| Ni1 | 0.64162(7)  | 0.64762(4) | 0.29731(3)  | 0.01510(13) |

|      | x/a         | y/b        | z/c         | U(eq)      |
|------|-------------|------------|-------------|------------|
| O1   | 0.7484(4)   | 0.6244(2)  | 0.48994(16) | 0.0261(9)  |
| P1   | 0.84456(14) | 0.49865(7) | 0.37607(5)  | 0.0139(2)  |
| P2   | 0.85938(14) | 0.77272(7) | 0.39148(5)  | 0.0144(2)  |
| C36  | 0.8108(13)  | 0.6286(6)  | 0.1084(4)   | 0.051(3)   |
| Cl4  | 0.7730(6)   | 0.7183(3)  | 0.0715(2)   | 0.0470(10) |
| Cl5  | 0.8149(8)   | 0.5473(2)  | 0.06421(18) | 0.0582(13) |
| C36A | 0.768(4)    | 0.6326(12) | 0.1057(11)  | 0.051(3)   |
| Cl4A | 0.8150(14)  | 0.7256(9)  | 0.0807(7)   | 0.0470(10) |
| Cl5A | 0.7487(19)  | 0.5539(8)  | 0.0590(6)   | 0.0582(13) |
| C37  | 0.2077(15)  | 0.6262(7)  | 0.2315(5)   | 0.029(3)   |
| Cl6  | 0.1781(11)  | 0.5477(5)  | 0.1823(2)   | 0.0278(10) |
| Cl7  | 0.1410(6)   | 0.7165(2)  | 0.2031(2)   | 0.0525(12) |
| C37A | 0.203(2)    | 0.6468(10) | 0.2167(9)   | 0.029(3)   |
| Cl6A | 0.176(2)    | 0.5465(9)  | 0.1959(4)   | 0.0278(10) |
| Cl7A | 0.0801(9)   | 0.7090(4)  | 0.1782(4)   | 0.0525(12) |

**Table S21.** Bond lengths (Å) for **4**.

|         |          |         |           |
|---------|----------|---------|-----------|
| C1-N1   | 1.348(7) | C1-C2   | 1.394(8)  |
| C1-H1   | 0.95     | C2-C3   | 1.378(8)  |
| C2-H2   | 0.95     | C3-C4   | 1.390(7)  |
| C3-H3   | 0.95     | C4-C5   | 1.402(7)  |
| C4-H4   | 0.95     | C5-N1   | 1.355(7)  |
| C5-P1   | 1.831(5) | C6-C7   | 1.392(7)  |
| C6-C11  | 1.407(7) | C6-P1   | 1.824(5)  |
| C7-C8   | 1.389(7) | C7-H7   | 0.95      |
| C8-C9   | 1.402(8) | C8-H8   | 0.95      |
| C9-C10  | 1.378(8) | C9-H9   | 0.95      |
| C10-C11 | 1.384(7) | C10-H10 | 0.95      |
| C11-H11 | 0.95     | C12-C17 | 1.394(7)  |
| C12-C13 | 1.399(7) | C12-P1  | 1.815(5)  |
| C13-C14 | 1.385(7) | C13-H13 | 0.95      |
| C14-C15 | 1.396(8) | C14-H14 | 0.95      |
| C15-C16 | 1.385(8) | C15-H15 | 0.95      |
| C16-C17 | 1.397(8) | C16-H16 | 0.95      |
| C17-H17 | 0.95     | C18-N2  | 1.347(6)  |
| C18-C19 | 1.385(7) | C18-H18 | 0.95      |
| C19-C20 | 1.385(8) | C19-H19 | 0.95      |
| C20-C21 | 1.382(8) | C20-H20 | 0.95      |
| C21-C22 | 1.395(7) | C21-H21 | 0.95      |
| C22-N2  | 1.364(7) | C22-P2  | 1.837(5)  |
| C23-C28 | 1.389(8) | C23-C24 | 1.395(8)  |
| C23-P2  | 1.829(5) | C24-C25 | 1.382(8)  |
| C24-H24 | 0.95     | C25-C26 | 1.383(10) |
| C25-H25 | 0.95     | C26-C27 | 1.381(10) |

|           |            |           |            |
|-----------|------------|-----------|------------|
| C26-H26   | 0.95       | C27-C28   | 1.395(8)   |
| C27-H27   | 0.95       | C28-H28   | 0.95       |
| C29-C30   | 1.397(7)   | C29-C34   | 1.409(7)   |
| C29-P2    | 1.824(5)   | C30-C31   | 1.393(7)   |
| C30-H30   | 0.95       | C31-C32   | 1.400(8)   |
| C31-H31   | 0.95       | C32-C33   | 1.376(8)   |
| C32-H32   | 0.95       | C33-C34   | 1.385(8)   |
| C33-H33   | 0.95       | C34-H34   | 0.95       |
| C35-O1    | 1.143(6)   | C35-Ir1   | 1.834(5)   |
| Cl1-Ir1   | 2.3837(14) | Cl1-Ni1   | 2.5170(16) |
| Cl2-Ni1   | 2.2990(15) | Cl3-Ni1   | 2.3569(16) |
| Ir1-P2    | 2.3146(15) | Ir1-P1    | 2.3184(15) |
| Ir1-Ni1   | 2.7019(10) | N1-Ni1    | 2.156(4)   |
| N2-Ni1    | 2.155(4)   | C36-Cl5   | 1.756(10)  |
| C36-Cl4   | 1.771(9)   | C36-H36A  | 0.99       |
| C36-H36B  | 0.99       | C36A-Cl5A | 1.747(16)  |
| C36A-Cl4A | 1.772(16)  | C36A-H36C | 0.99       |
| C36A-H36D | 0.99       | C37-Cl7   | 1.753(10)  |
| C37-Cl6   | 1.785(10)  | C37-H37A  | 0.99       |
| C37-H37B  | 0.99       | C37A-Cl7A | 1.747(15)  |
| C37A-Cl6A | 1.772(14)  | C37A-H37C | 0.99       |
| C37A-H37D | 0.99       |           |            |

**Table S22.** Bond angles (°) for **4**.

|             |          |             |          |
|-------------|----------|-------------|----------|
| N1-C1-C2    | 123.4(5) | N1-C1-H1    | 118.3    |
| C2-C1-H1    | 118.3    | C3-C2-C1    | 119.2(5) |
| C3-C2-H2    | 120.4    | C1-C2-H2    | 120.4    |
| C2-C3-C4    | 118.4(5) | C2-C3-H3    | 120.8    |
| C4-C3-H3    | 120.8    | C3-C4-C5    | 119.6(5) |
| C3-C4-H4    | 120.2    | C5-C4-H4    | 120.2    |
| N1-C5-C4    | 122.0(5) | N1-C5-P1    | 117.7(4) |
| C4-C5-P1    | 120.0(4) | C7-C6-C11   | 118.9(5) |
| C7-C6-P1    | 118.3(4) | C11-C6-P1   | 122.9(4) |
| C8-C7-C6    | 120.8(5) | C8-C7-H7    | 119.6    |
| C6-C7-H7    | 119.6    | C7-C8-C9    | 119.4(5) |
| C7-C8-H8    | 120.3    | C9-C8-H8    | 120.3    |
| C10-C9-C8   | 120.2(5) | C10-C9-H9   | 119.9    |
| C8-C9-H9    | 119.9    | C9-C10-C11  | 120.4(5) |
| C9-C10-H10  | 119.8    | C11-C10-H10 | 119.8    |
| C10-C11-C6  | 120.3(5) | C10-C11-H11 | 119.9    |
| C6-C11-H11  | 119.9    | C17-C12-C13 | 119.1(5) |
| C17-C12-P1  | 118.7(4) | C13-C12-P1  | 122.1(4) |
| C14-C13-C12 | 120.1(5) | C14-C13-H13 | 120.0    |
| C12-C13-H13 | 120.0    | C13-C14-C15 | 120.9(5) |
| C13-C14-H14 | 119.5    | C15-C14-H14 | 119.5    |

|             |            |             |            |
|-------------|------------|-------------|------------|
| C16-C15-C14 | 119.1(5)   | C16-C15-H15 | 120.4      |
| C14-C15-H15 | 120.4      | C15-C16-C17 | 120.4(5)   |
| C15-C16-H16 | 119.8      | C17-C16-H16 | 119.8      |
| C12-C17-C16 | 120.5(5)   | C12-C17-H17 | 119.8      |
| C16-C17-H17 | 119.8      | N2-C18-C19  | 123.7(5)   |
| N2-C18-H18  | 118.1      | C19-C18-H18 | 118.1      |
| C18-C19-C20 | 119.0(5)   | C18-C19-H19 | 120.5      |
| C20-C19-H19 | 120.5      | C21-C20-C19 | 118.5(5)   |
| C21-C20-H20 | 120.8      | C19-C20-H20 | 120.8      |
| C20-C21-C22 | 119.7(5)   | C20-C21-H21 | 120.1      |
| C22-C21-H21 | 120.1      | N2-C22-C21  | 122.0(5)   |
| N2-C22-P2   | 116.6(4)   | C21-C22-P2  | 121.0(4)   |
| C28-C23-C24 | 119.9(5)   | C28-C23-P2  | 120.8(4)   |
| C24-C23-P2  | 118.9(4)   | C25-C24-C23 | 119.9(6)   |
| C25-C24-H24 | 120.1      | C23-C24-H24 | 120.1      |
| C24-C25-C26 | 120.0(6)   | C24-C25-H25 | 120.0      |
| C26-C25-H25 | 120.0      | C27-C26-C25 | 120.7(6)   |
| C27-C26-H26 | 119.6      | C25-C26-H26 | 119.6      |
| C26-C27-C28 | 119.5(6)   | C26-C27-H27 | 120.2      |
| C28-C27-H27 | 120.2      | C23-C28-C27 | 119.9(6)   |
| C23-C28-H28 | 120.0      | C27-C28-H28 | 120.0      |
| C30-C29-C34 | 118.4(5)   | C30-C29-P2  | 119.4(4)   |
| C34-C29-P2  | 122.1(4)   | C31-C30-C29 | 121.0(5)   |
| C31-C30-H30 | 119.5      | C29-C30-H30 | 119.5      |
| C30-C31-C32 | 119.3(5)   | C30-C31-H31 | 120.4      |
| C32-C31-H31 | 120.4      | C33-C32-C31 | 120.5(5)   |
| C33-C32-H32 | 119.8      | C31-C32-H32 | 119.8      |
| C32-C33-C34 | 120.3(5)   | C32-C33-H33 | 119.9      |
| C34-C33-H33 | 119.9      | C33-C34-C29 | 120.6(5)   |
| C33-C34-H34 | 119.7      | C29-C34-H34 | 119.7      |
| O1-C35-Ir1  | 177.9(5)   | Ir1-Cl1-Ni1 | 66.85(3)   |
| C35-Ir1-P2  | 89.84(16)  | C35-Ir1-P1  | 89.63(16)  |
| P2-Ir1-P1   | 179.45(5)  | C35-Ir1-Cl1 | 171.67(17) |
| P2-Ir1-Cl1  | 90.35(4)   | P1-Ir1-Cl1  | 90.15(4)   |
| C35-Ir1-Ni1 | 112.74(17) | P2-Ir1-Ni1  | 90.05(4)   |
| P1-Ir1-Ni1  | 90.01(3)   | Cl1-Ir1-Ni1 | 58.93(4)   |
| C1-N1-C5    | 117.3(4)   | C1-N1-Ni1   | 113.9(4)   |
| C5-N1-Ni1   | 128.7(3)   | C18-N2-C22  | 116.8(4)   |
| C18-N2-Ni1  | 114.5(3)   | C22-N2-Ni1  | 128.7(3)   |
| N2-Ni1-N1   | 177.99(16) | N2-Ni1-Cl2  | 88.80(12)  |
| N1-Ni1-Cl2  | 89.59(12)  | N2-Ni1-Cl3  | 89.14(12)  |
| N1-Ni1-Cl3  | 90.30(13)  | Cl2-Ni1-Cl3 | 110.89(6)  |
| N2-Ni1-Cl1  | 91.83(12)  | N1-Ni1-Cl1  | 90.13(12)  |
| Cl2-Ni1-Cl1 | 155.32(6)  | Cl3-Ni1-Cl1 | 93.79(5)   |
| N2-Ni1-Ir1  | 90.69(12)  | N1-Ni1-Ir1  | 90.80(12)  |

|                |            |                |            |
|----------------|------------|----------------|------------|
| Cl2-Ni1-Ir1    | 101.12(5)  | Cl3-Ni1-Ir1    | 147.98(5)  |
| Cl1-Ni1-Ir1    | 54.21(3)   | C12-P1-C6      | 106.3(2)   |
| C12-P1-C5      | 100.1(2)   | C6-P1-C5       | 107.5(2)   |
| C12-P1-Ir1     | 114.61(16) | C6-P1-Ir1      | 114.67(17) |
| C5-P1-Ir1      | 112.40(17) | C29-P2-C23     | 105.2(2)   |
| C29-P2-C22     | 106.4(2)   | C23-P2-C22     | 100.8(2)   |
| C29-P2-Ir1     | 117.07(17) | C23-P2-Ir1     | 113.18(17) |
| C22-P2-Ir1     | 112.66(17) | Cl5-C36-Cl4    | 111.7(6)   |
| Cl5-C36-H36A   | 109.3      | Cl4-C36-H36A   | 109.3      |
| Cl5-C36-H36B   | 109.3      | Cl4-C36-H36B   | 109.3      |
| H36A-C36-H36B  | 107.9      | Cl5A-C36A-Cl4A | 116.5(15)  |
| Cl5A-C36A-H36C | 108.2      | Cl4A-C36A-H36C | 108.2      |
| Cl5A-C36A-H36D | 108.2      | Cl4A-C36A-H36D | 108.2      |
| H36C-C36A-H36D | 107.3      | Cl7-C37-Cl6    | 111.4(7)   |
| Cl7-C37-H37A   | 109.3      | Cl6-C37-H37A   | 109.3      |
| Cl7-C37-H37B   | 109.3      | Cl6-C37-H37B   | 109.3      |
| H37A-C37-H37B  | 108.0      | Cl7A-C37A-Cl6A | 111.0(12)  |
| Cl7A-C37A-H37C | 109.4      | Cl6A-C37A-H37C | 109.4      |
| Cl7A-C37A-H37D | 109.4      | Cl6A-C37A-H37D | 109.4      |
| H37C-C37A-H37D | 108.0      |                |            |

**Table S23.** Anisotropic atomic displacement parameters ( $\text{\AA}^2$ ) for **4**.

The anisotropic atomic displacement factor exponent takes the form:  $-2\pi^2[ h^2 a^{*2} U_{11} + \dots + 2 h k a^* b^* U_{12} ]$

|     | $U_{11}$ | $U_{22}$ | $U_{33}$ | $U_{23}$    | $U_{13}$    | $U_{12}$    |
|-----|----------|----------|----------|-------------|-------------|-------------|
| C1  | 0.021(3) | 0.022(3) | 0.023(3) | -0.003(2)   | 0.002(2)    | 0.000(2)    |
| C2  | 0.021(3) | 0.024(3) | 0.022(3) | -0.008(2)   | 0.001(2)    | -0.006(2)   |
| C3  | 0.029(3) | 0.018(2) | 0.022(2) | -0.005(2)   | 0.007(2)    | -0.007(2)   |
| C4  | 0.026(3) | 0.015(2) | 0.018(2) | 0.0009(18)  | 0.005(2)    | -0.0010(19) |
| C5  | 0.017(2) | 0.013(2) | 0.015(2) | -0.0027(18) | 0.0059(18)  | -0.0034(18) |
| C6  | 0.017(2) | 0.017(2) | 0.014(2) | -0.0027(18) | 0.0043(18)  | -0.0016(18) |
| C7  | 0.017(2) | 0.017(2) | 0.021(2) | 0.0019(19)  | -0.0012(19) | 0.0014(19)  |
| C8  | 0.015(2) | 0.022(3) | 0.032(3) | 0.000(2)    | 0.003(2)    | -0.002(2)   |
| C9  | 0.019(2) | 0.021(3) | 0.029(3) | 0.000(2)    | 0.002(2)    | 0.003(2)    |
| C10 | 0.025(3) | 0.015(2) | 0.026(3) | 0.003(2)    | 0.007(2)    | 0.002(2)    |
| C11 | 0.021(2) | 0.015(2) | 0.023(2) | 0.002(2)    | 0.0063(19)  | 0.000(2)    |
| C12 | 0.016(2) | 0.013(2) | 0.016(2) | -0.0002(17) | 0.0032(18)  | -0.0002(17) |
| C13 | 0.020(2) | 0.021(2) | 0.018(2) | 0.001(2)    | 0.0027(19)  | 0.001(2)    |
| C14 | 0.031(3) | 0.023(3) | 0.018(2) | 0.005(2)    | 0.004(2)    | -0.002(2)   |
| C15 | 0.035(3) | 0.025(3) | 0.021(3) | 0.003(2)    | 0.011(2)    | -0.006(2)   |
| C16 | 0.022(3) | 0.029(3) | 0.028(3) | -0.003(2)   | 0.010(2)    | -0.002(2)   |
| C17 | 0.018(2) | 0.026(3) | 0.018(2) | 0.001(2)    | 0.0009(19)  | -0.001(2)   |
| C18 | 0.017(2) | 0.020(2) | 0.019(2) | 0.001(2)    | 0.0017(19)  | 0.0011(19)  |
| C19 | 0.022(3) | 0.019(2) | 0.018(2) | 0.0008(19)  | 0.003(2)    | 0.004(2)    |
| C20 | 0.026(3) | 0.019(2) | 0.020(2) | 0.001(2)    | 0.007(2)    | 0.002(2)    |
| C21 | 0.020(2) | 0.017(2) | 0.022(3) | -0.002(2)   | 0.005(2)    | 0.002(2)    |

|      | U <sub>11</sub> | U <sub>22</sub> | U <sub>33</sub> | U <sub>23</sub> | U <sub>13</sub> | U <sub>12</sub> |
|------|-----------------|-----------------|-----------------|-----------------|-----------------|-----------------|
| C22  | 0.019(2)        | 0.017(2)        | 0.014(2)        | 0.0001(18)      | 0.0033(18)      | 0.0021(19)      |
| C23  | 0.025(3)        | 0.016(2)        | 0.015(2)        | 0.0017(19)      | 0.005(2)        | 0.003(2)        |
| C24  | 0.027(3)        | 0.032(3)        | 0.017(2)        | 0.001(2)        | 0.008(2)        | 0.006(2)        |
| C25  | 0.045(4)        | 0.044(4)        | 0.033(3)        | 0.006(3)        | 0.024(3)        | 0.019(3)        |
| C26  | 0.061(4)        | 0.027(3)        | 0.021(3)        | 0.000(2)        | 0.020(3)        | 0.006(3)        |
| C27  | 0.049(4)        | 0.026(3)        | 0.018(3)        | -0.002(2)       | 0.005(3)        | -0.004(3)       |
| C28  | 0.033(3)        | 0.019(3)        | 0.021(3)        | -0.001(2)       | 0.003(2)        | -0.003(2)       |
| C29  | 0.016(2)        | 0.016(2)        | 0.015(2)        | 0.0003(18)      | -0.0004(18)     | 0.0007(18)      |
| C30  | 0.017(2)        | 0.016(2)        | 0.020(2)        | 0.0033(19)      | 0.0001(19)      | 0.0018(19)      |
| C31  | 0.016(2)        | 0.022(3)        | 0.033(3)        | 0.003(2)        | 0.004(2)        | 0.003(2)        |
| C32  | 0.016(2)        | 0.023(3)        | 0.037(3)        | 0.007(2)        | -0.001(2)       | -0.004(2)       |
| C33  | 0.028(3)        | 0.016(2)        | 0.030(3)        | 0.000(2)        | 0.001(2)        | -0.004(2)       |
| C34  | 0.023(3)        | 0.019(2)        | 0.022(3)        | 0.001(2)        | 0.001(2)        | -0.001(2)       |
| C35  | 0.023(2)        | 0.014(2)        | 0.018(2)        | -0.0020(19)     | 0.0053(19)      | -0.002(2)       |
| Cl1  | 0.0208(5)       | 0.0170(5)       | 0.0158(5)       | 0.0006(4)       | 0.0054(4)       | -0.0006(4)      |
| Cl2  | 0.0293(6)       | 0.0188(6)       | 0.0329(7)       | -0.0035(5)      | 0.0170(5)       | -0.0036(5)      |
| Cl3  | 0.0281(7)       | 0.0295(7)       | 0.0143(5)       | -0.0004(5)      | 0.0010(5)       | 0.0030(5)       |
| Ir1  | 0.01376(8)      | 0.01195(8)      | 0.01257(8)      | -0.00006(7)     | 0.00217(6)      | 0.00002(7)      |
| N1   | 0.016(2)        | 0.017(2)        | 0.019(2)        | -0.0033(17)     | 0.0039(16)      | -0.0019(16)     |
| N2   | 0.0140(19)      | 0.016(2)        | 0.018(2)        | 0.0002(16)      | 0.0033(16)      | 0.0004(16)      |
| Ni1  | 0.0165(3)       | 0.0147(3)       | 0.0140(3)       | -0.0005(2)      | 0.0022(2)       | -0.0002(2)      |
| O1   | 0.033(2)        | 0.025(2)        | 0.0238(19)      | -0.0007(16)     | 0.0148(17)      | -0.0027(17)     |
| P1   | 0.0148(6)       | 0.0137(5)       | 0.0132(6)       | 0.0001(4)       | 0.0020(5)       | -0.0010(5)      |
| P2   | 0.0151(6)       | 0.0139(5)       | 0.0141(6)       | -0.0002(5)      | 0.0022(5)       | 0.0008(5)       |
| C36  | 0.059(9)        | 0.049(5)        | 0.054(5)        | 0.030(4)        | 0.037(6)        | 0.038(5)        |
| Cl4  | 0.035(2)        | 0.0435(15)      | 0.064(2)        | 0.0206(15)      | 0.013(2)        | 0.0090(18)      |
| Cl5  | 0.087(4)        | 0.0464(14)      | 0.0465(15)      | 0.0101(11)      | 0.026(2)        | -0.007(2)       |
| C36A | 0.059(9)        | 0.049(5)        | 0.054(5)        | 0.030(4)        | 0.037(6)        | 0.038(5)        |
| Cl4A | 0.035(2)        | 0.0435(15)      | 0.064(2)        | 0.0206(15)      | 0.013(2)        | 0.0090(18)      |
| Cl5A | 0.087(4)        | 0.0464(14)      | 0.0465(15)      | 0.0101(11)      | 0.026(2)        | -0.007(2)       |
| C37  | 0.027(3)        | 0.030(7)        | 0.031(7)        | -0.003(5)       | 0.005(5)        | -0.001(5)       |
| Cl6  | 0.0312(9)       | 0.0259(8)       | 0.024(3)        | 0.004(2)        | -0.002(3)       | -0.0046(6)      |
| Cl7  | 0.067(3)        | 0.0271(12)      | 0.076(3)        | 0.0106(19)      | 0.047(2)        | 0.0090(18)      |
| C37A | 0.027(3)        | 0.030(7)        | 0.031(7)        | -0.003(5)       | 0.005(5)        | -0.001(5)       |
| Cl6A | 0.0312(9)       | 0.0259(8)       | 0.024(3)        | 0.004(2)        | -0.002(3)       | -0.0046(6)      |
| Cl7A | 0.067(3)        | 0.0271(12)      | 0.076(3)        | 0.0106(19)      | 0.047(2)        | 0.0090(18)      |

**Table S24.** Hydrogen atomic coordinates and isotropic atomic displacement parameters (Å<sup>2</sup>) for **4**.

|    | x/a    | y/b    | z/c    | U(eq) |
|----|--------|--------|--------|-------|
| H1 | 0.4643 | 0.5320 | 0.2319 | 0.026 |
| H2 | 0.4210 | 0.3979 | 0.2141 | 0.027 |
| H3 | 0.5772 | 0.3029 | 0.2585 | 0.027 |
| H4 | 0.7636 | 0.3462 | 0.3255 | 0.024 |
| H7 | 1.1074 | 0.5558 | 0.3579 | 0.022 |

|      | x/a    | y/b    | z/c    | U(eq) |
|------|--------|--------|--------|-------|
| H8   | 1.3240 | 0.5009 | 0.3499 | 0.028 |
| H9   | 1.3564 | 0.3626 | 0.3577 | 0.028 |
| H10  | 1.1736 | 0.2811 | 0.3728 | 0.026 |
| H11  | 0.9602 | 0.3360 | 0.3841 | 0.023 |
| H13  | 0.9647 | 0.4151 | 0.4770 | 0.024 |
| H14  | 0.8718 | 0.3571 | 0.5485 | 0.029 |
| H15  | 0.6303 | 0.3579 | 0.5482 | 0.032 |
| H16  | 0.4816 | 0.4146 | 0.4739 | 0.031 |
| H17  | 0.5735 | 0.4721 | 0.4014 | 0.025 |
| H18  | 0.4656 | 0.7799 | 0.2518 | 0.022 |
| H19  | 0.4465 | 0.9166 | 0.2443 | 0.024 |
| H20  | 0.6210 | 0.9972 | 0.2942 | 0.026 |
| H21  | 0.8027 | 0.9362 | 0.3545 | 0.023 |
| H24  | 0.5900 | 0.8067 | 0.4185 | 0.03  |
| H25  | 0.5052 | 0.8420 | 0.4982 | 0.046 |
| H26  | 0.6598 | 0.8656 | 0.5794 | 0.042 |
| H27  | 0.8994 | 0.8517 | 0.5824 | 0.037 |
| H28  | 0.9858 | 0.8138 | 0.5029 | 0.029 |
| H30  | 1.1182 | 0.7273 | 0.3594 | 0.021 |
| H31  | 1.3369 | 0.7861 | 0.3604 | 0.028 |
| H32  | 1.3780 | 0.9154 | 0.3953 | 0.031 |
| H33  | 1.2026 | 0.9849 | 0.4280 | 0.03  |
| H34  | 0.9850 | 0.9267 | 0.4275 | 0.026 |
| H36A | 0.9023 | 0.6334 | 0.1328 | 0.061 |
| H36B | 0.7389 | 0.6192 | 0.1318 | 0.061 |
| H36C | 0.8405 | 0.6176 | 0.1374 | 0.061 |
| H36D | 0.6793 | 0.6392 | 0.1197 | 0.061 |
| H37A | 0.1626 | 0.6130 | 0.2634 | 0.035 |
| H37B | 0.3092 | 0.6318 | 0.2447 | 0.035 |
| H37C | 0.1966 | 0.6517 | 0.2561 | 0.035 |
| H37D | 0.2982 | 0.6634 | 0.2119 | 0.035 |
